1 **DROP: Molecular voucher database for identification of *Drosophila* parasitoids**

2 Resource article

3 Word count: 8237 excluding references

4

5 **Authors**

6 Chia-Hua Lue (C-HL), (0000-0002-5245-603X), [chiachia926@gmail.com](mailto:chiachia926@gmail.com), corresponding

7 author

8 Matthew L. Buffington (MLB)

9 Sonja Scheffer (SS)

10 Matthew Lewis (ML)

11 Tyler A. Elliott (TAE)

12 Amelia R. I. Lindsey (AL)

13 Amy Driskell (AD), (0000-0001-8401-7923)

14 Anna Jandova (AJ)

15 Masahito T. Kimura (MTK)

16 Yves Carton (YC)

17 Robert R. Kula (RRK)

18 Todd A. Schlenke (TAS)

19 Mariana Mateos (MM), (0000-0001-5738-0145)

20 Shubha Govind (SG), (0000-0002-6436-639X)

21 Julien Varaldi (JV)

22 Emilio Guerrieri (EG), (0000-0002-0583-4667)

- 23 Massimo Giorgini (MG), (0000-0001-8670-0945)
- 24 Xingeng Wang (XW)
- 25 Kim Hoelmer (KH)
- 26 Kent M. Daane (KMD)
- 27 Paul K. Abram (PKA)
- 28 Nicholas A. Pardikes (NAP), (0000-0002-9175-4494)
- 29 Joel J. Brown (JJB), (0000-0002-3608-6745)
- 30 Melanie Thierry (MT)
- 31 Marylène Poirié (MP)
- 32 Paul Goldstein (PG), (0000-0002-1443-7030)
- 33 Scott E. Miller (SEM), (0000-0002-4138-1378)
- 34 W. Daniel Tracey (WDT)
- 35 Jeremy S. Davis (JSD), (0000-0002-5214-161X)
- 36 Francis M. Jiggins (FMJ)
- 37 Bregje Wertheim (BW)
- 38 Owen T. Lewis (OTL)
- 39 Jeff Leips (JL)
- 40 Phillip P. A. Staniczenko (PPAS)
- 41 Jan Hrcek (JH), (0000-0003-0711-6447), [janhrcek@gmail.com](mailto:janhrcek@gmail.com)
- 42
- 43
- 44

45 **Affiliations**

46 (C-HL, AJ, NAP, JJB, MT, JH) Biology Centre of the Czech Academy of Sciences, Institute

47 of Entomology, Branisovska 31, 37005 Ceske Budejovice, Czech Republic

48 (C-HL, PPAS) Department of Biology, Brooklyn College, City University of New York

49 (CUNY), 2900 Bedford Ave, Brooklyn, NY11210, USA

50 (MLB, SS, ML, RRK, PG) Systematic Entomology Laboratory, ARS/USDA c/o Smithsonian

51 Institution, National Museum of Natural History, 10th& Constitution Ave, NW,

52 Washington DC 20560, USA

53 (TAE) Centre for Biodiversity Genomics, 50 Stone Road East, University of Guelph,

54 Guelph, Ontario, N1G2W1, Canada

55 (AL) Department of Entomology, University of Minnesota, Saint Paul MN 55108.

56 (AD) Laboratories of Analytical Biology, Smithsonian Institution, National Museum of

57 Natural History, 10th & Constitution Ave, NW, Washington DC 20560, USA

58 (MTK) Hokkaido University Museum, Sapporo, Hokkaido 060-0810, Japan

59 (YC) “Évolution, Génomes, Comportement, Écologie”, CNRS et Université Paris-Saclay

60 (TAS) Department of Entomology at the University of Arizona, Forbes 410, PO BOX

61 210036, Tucson, AZ 85721-0036.

62 (MM) Wildlife and Fisheries Sciences Department, Texas A&M University

63 (SG) The Graduate Center of the City University of New York, 365 Fifth Avenue, New

64 York, NY10016, USA

65 (JV) Université de Lyon, Université Lyon 1, CNRS, Laboratoire de Biométrie et Biologie

66 Evolutive UMR 5558, F-69622 Villeurbanne, France

67 (EG, MG) CNR- Institute for Sustainable Plant Protection (CNR-IPSP), National Research  
68 Council of Italy, Piazzale E. Fermi 1, 80055 Portici, Italy.

69 (XW, KH) United States Department of Agriculture, Agricultural Research Services,  
70 Beneficial Insects Introduction Research Unit. 501 S. Chapel St., Newark, DE 19713, USA

71 (KMD) Department of Environmental Science, Policy and Management. University of  
72 California, Berkeley. Mulford Hall, 130 Hilgard Way, Berkeley, CA 94720.

73 (PKA) Agriculture and Agri-Food Canada, Agassiz Research and Development Centre,  
74 6947 Hwy #7, Agassiz, V0M 1A0, British Columbia, Canada

75 (JJB, MT, JH) University of South Bohemia, Faculty of Science, Branisovska 31, 37005,  
76 Czech Republic

77 (MP) Université “Côte d’Azur”, INRAE, CNRS. and Evolution and Specificity of  
78 Multitrophic Interactions (ESIM) Sophia Agrobiotech Institute, 400 Route des Chappes,  
79 BP 167, 06903 Sophia Antipolis, France

80 (SEM) Smithsonian Institution, National Museum of Natural History, 10th & Constitution  
81 Ave, NW, Washington DC 20560, USA

82 (WDT, JSD) Department of Biology, Indiana University Bloomington. 702 N. Walnut  
83 Grove, Bloomington, IN47405

84 (WDT) Gill Center for Biomolecular Science, Indiana University Bloomington. 702 N.  
85 Walnut Grove, Bloomington, IN47405

86 (JSD) Biology Department, University of Kentucky, 101 T. H. Morgan Building, Lexington,  
87 KY, 40506

88 (FMJ) Department of Genetics, University of Cambridge, Downing Street, Cambridge CB2

89 3EH UK

90 (BW) Groningen Institute for Evolutionary Life Sciences, University of Groningen,

91 Nijenborgh 9, 9747 AG Groningen, the Netherlands

92 (OTL) Department of Zoology, University of Oxford. 11a Mansfield Road, Oxford OX1

93 3SZ, UK.

94 (JL) Department of Biological Sciences, University of Maryland Baltimore County. 1000

95 Hilltop circle, Baltimore, MD, 21250

96

97

98 **Abstract**

99       Molecular identification is increasingly used to speed up biodiversity surveys and  
100 laboratory experiments. However, many groups of organisms cannot be reliably  
101 identified using standard databases such as GenBank or BOLD due to lack of sequenced  
102 voucher specimens identified by experts. Sometimes a large number of sequences are  
103 available, but with too many errors to allow identification. Here we address this  
104 problem for parasitoids of *Drosophila* by introducing a curated open-access molecular  
105 reference database, DROP (*Drosophila* parasitoids). Identifying *Drosophila* parasitoids is  
106 challenging and poses a major impediment to realize the full potential of this model  
107 system in studies ranging from molecular mechanisms to food webs, and in biological  
108 control of *Drosophila suzukii*. In DROP (<http://doi.org/10.5281/zenodo.4519656>),  
109 genetic data are linked to voucher specimens and, where possible, the voucher

110 specimens are identified by taxonomists and vetted through direct comparison with  
111 primary type material. To initiate DROP, we curated 154 laboratory strains, 856  
112 vouchers, 554 DNA sequences, 16 genomes, 14 transcriptomes, and 6 proteomes drawn  
113 from a total of 183 operational taxonomic units (OTUs): 114 described *Drosophila*  
114 parasitoid species and 69 provisional species. We found species richness of *Drosophila*  
115 parasitoids to be heavily underestimated and provide an updated taxonomic catalogue  
116 for the community. DROP offers accurate molecular identification and improves cross-  
117 referencing between individual studies that we hope will catalyze research on this  
118 diverse and fascinating model system. Our effort should also serve as an example for  
119 researchers facing similar molecular identification problems in other groups of  
120 organisms.

121

## 122 **Key Words**

123 Biodiversity, DNA sequences, Genomes, Integrative taxonomy, Molecular diagnostics,

124 Biological control

125

126

127

128

129

130

131

## 132 **Introduction**

133 Building a knowledge base that encompasses ecology, evolution, genetics, and  
134 biological control is contingent on reliable taxonomic identifications. Molecular  
135 identification is commonly used in groups of organisms with cryptic species that are  
136 difficult to identify morphologically (Fagan-Jeffries et al., 2018; Miller et al., 2016;  
137 Novotny & Miller, 2014), for the molecular detection of species interactions (Baker et  
138 al., 2016; Condon et al., 2014; Garipey et al., 2019; Hrček & Godfray, 2015; Hrcek et al.,  
139 2011), and for identification of species from environmental DNA samples (Shokralla et  
140 al., 2012). The accuracy of molecular identification, however, depends on the accuracy  
141 of identifications associated with sequences databased in existing online depositories  
142 (Fontes et al., 2021). The foundations of that accuracy are the voucher specimens which  
143 were sequenced and the collaboration of a taxonomic authority in the deposition of the  
144 sequence data.

145 GenBank serves as the most widely used sequence depository; however,  
146 deposition of sequences in GenBank, which is required by most peer-reviewed journals,  
147 does not require deposition of associated vouchers. The Barcode of Life Data System  
148 database (BOLD) (Ratnasingham & Hebert, 2007) explicitly aims to provide a framework  
149 for identifying specimens using single-locus DNA sequences (Hebert et al., 2003; Smith  
150 et al., 2005), and while these are associated with vouchers and metadata, the curation  
151 of these data is not consistently maintained by those submitting material. A recent  
152 study by Pentinsaari et al. (2020) showed misidentification in both databases caused by  
153 missteps in the protocols from query sequences to final determination.

154           Although the BOLD database function “BOLD-IDS” allows considerable database  
155   curation (e.g. flagging of misidentified/contaminated records), it also automatically  
156   includes sequences from GenBank, and may perpetuate the shortcomings previously  
157   mentioned since these cannot be curated from within BOLD. As such, the quality of  
158   sequences and the reliability of identifications obtained from BOLD-IDS can vary, and  
159   depends on the curation by taxonomists focusing on individual taxa (Meiklejohn et al.,  
160   2019). BOLD-IDS works well for taxa where qualified taxonomists have been involved  
161   with assuring data quality; some insect examples include beetles (Hendrich et al., 2015),  
162   butterflies (Escalante et al., 2010), geometrid moths (Hausmann et al., 2011, 2016;  
163   Miller et al., 2016), true bugs (Raupach et al., 2014), and microgastrine wasps (Smith et  
164   al., 2013).

165           Unfortunately, this is not the case of parasitoids (Insecta: Hymenoptera) of  
166   *Drosophila* flies (Insecta: Drosophilidae). There are vast numbers of *Drosophila*  
167   parasitoid sequences readily available in GenBank and BOLD, as these parasitoids and  
168   their hosts are important model organisms in biology. As of this writing, there are  
169   88,666 nucleotide sequences deposited in GenBank for *Leptopilina heterotoma*  
170   (Thomson) and *L. boulardi* (Barbotin, Carton & Kelner-Pillault) (Hymenoptera: Figitidae)  
171   alone. However, less than 1 % of the identifications associated with these sequences  
172   have been confirmed by taxonomists or are associated with voucher specimens  
173   deposited in museum collections. With sequencing shifting from individual genes to  
174   genomes we risk that the identification problems will soon apply to whole genomes.

175   ***Drosophila and their parasitoids***



176 The phylogenetic and subgeneric structure within *Drosophila* and related genera is  
177 not yet fully resolved (O’Grady & DeSalle, 2018). Various subgenera, including  
178 *Scaptomyza*, *Zaprionus*, *Lordiphosa* and *Samoaia*, have been treated as both genera and  
179 subgenera, and researchers have yet to achieve consensus on these various hypotheses  
180 (O’Grady & DeSalle, 2018; Remsen & O’Grady, 2002; Yassin, 2013; Yassin & David,  
181 2010). Species in *Drosophila* subgenera and genera closely related to *Drosophila*  
182 commonly share niche space and natural histories and, as a result, are often attacked by  
183 overlapping or identical groups of parasitoids. For instance, the invasive African fig fly,  
184 *Zaprionus indianus* Gupta is attacked by *Pachycrepoideus vindemiae* (Rondani, 1875)  
185 and *Leptopilina bouleardi* (Pfeiffer et al., 2019; Santos et al., 2016), all of which have been  
186 recorded from *Drosophila*. Therefore, we also include these groups within the contents  
187 of DROP.

188 Parasitoids of *Drosophila* belong to four superfamilies of Hymenoptera  
189 (Chalcidoidea, Cynipoidea, Ichneumonoidea, Diaprioidea) which evolved parasitism of  
190 *Drosophila* flies independently. All the parasitoids known to attack *Drosophila* are  
191 solitary and attack either the larval or pupal stage; in both cases, they emerge from the  
192 fly’s puparium (Carton et al., 1986; Prévost, 2009). The known *Drosophila* larval  
193 parasitoids belong to two families (Table 1), Braconidae (including the genera *Asobara*,  
194 *Aphaereta*, *Phaenocarpa*, *Tanycarpa*, *Aspilota*, *Opius*) and Figitidae (*Leptopilina*,  
195 *Ganaspis*, *Leptolamina*, *Kleidotoma*); all are koinobionts that allow the host to continue  
196 development while the parasitoid grows within it. The known *Drosophila* pupal  
197 parasitoids belong to three other families (Table 1), Diapriidae (*Trichopria*, *Spilomicrus*),

198 Pteromalidae (*Pachycrepoideus*, *Spalangia*, *Trichomalopsis*, *Toxomorpha*) and Encyrtidae  
199 (*Tachinaephagus*); they are all idiobionts that terminate host development immediately.  
200 Host-specificity across the *Drosophila* parasitoids is poorly characterized—while some  
201 can parasitize other families of Diptera (e.g., *Aphaereta aotea*) (Hughes & Woolcock,  
202 1976), most are thought to be limited to *Drosophila* hosts.

203       There are around 4000 described species of Drosophilidae, and *Drosophila* contains  
204 more than a third of the family's described species (O'Grady & DeSalle, 2018). By  
205 contrast, although parasitic wasps are generally a species-rich group (Dolphin & Quicke,  
206 2001; Quicke, 2015), the most recent catalogue of parasitoid species that attack  
207 *Drosophila* lists only 50 described species (Carton et al., 1986). This disparity suggests  
208 that the diversity of parasitic wasps attacking *Drosophila* is severely underestimated, an  
209 assertion supported by the results presented here. This is largely a consequence of the  
210 challenging nature of parasitoid taxonomy, in which morphological identification is  
211 intractable for many species, and the fact that taxonomic specialists are greatly  
212 outnumbered by the species they study.

213       Currently, only a few biological study systems have been characterized in  
214 sufficient breadth and depth to allow researchers to connect various levels of biological  
215 organization, from molecular mechanisms to food webs of interacting species.  
216 Parasitoids of *Drosophila* represent one such system (Prévost, 2009). Moreover, the  
217 practical feasibility of rearing parasitoids of *Drosophila* under laboratory conditions has  
218 led to a number of fundamental discoveries in ecology (Carton et al., 1991; Terry et al.,  
219 2021), evolution (Kraaijeveld & Godfray, 1997), immunology (Kim-Jo et al., 2019; Nappi

220 & Carton, 2001; Schlenke et al., 2007), physiology (Melk & Govind, 1999), symbiosis (Xie  
221 et al., 2011, 2015), behavioral science (Lefèvre et al., 2012) and other fields. In contrast  
222 to this large body of laboratory studies, basic natural history of *Drosophila* parasitoids,  
223 especially their species richness is little known (Kimura & Mitsui, 2020; Lue et al., 2018).  
224 Addressing this knowledge gap is especially pressing given current efforts to use  
225 parasitoids in biological control efforts, such as those of the invasive pest spotted wing  
226 *Drosophila*, *Drosophila suzukii* (Abram et al., 2020; Daane et al., 2016; Giorgini et al.,  
227 2019; Wang et al., 2020 a&b).

228 Properly executed molecular identification has the potential to be much more  
229 efficient for the majority of researchers, and many laboratory strains are commonly  
230 identified using DNA sequences alone. While it is practical for researchers to assign  
231 species names based on a match to sequence records in genetic databases, this practice  
232 often causes a cascade of inaccuracies. To illustrate the extent of the problem, we  
233 present the example of *Ganaspis*, a genus of parasitoids commonly used in laboratories  
234 that includes both superficially indistinguishable species with highly divergent  
235 sequences that are often treated as conspecific, as well as specimens with identical  
236 sequences identified under different names (Figure 1).

### 237 ***Aims***

238 To address these issues, we introduce a newly curated molecular reference database  
239 for *Drosophila* parasitoids —DROP— in which sequences are either linked to voucher  
240 specimens identified by taxonomists or have a traceable provenance (Figure 2). The first  
241 aim of DROP is to provide a reliable DNA sequence library for molecular identification of

242 *Drosophila* parasitoids that enables cross-referencing of original taxonomic concepts  
243 with those of subsequent studies. We pay special attention to live parasitoid strains  
244 which are available for future experiments. The second aim is to standardize and  
245 expedite the linkage between specimens and available sequence data; we place a  
246 premium on museum vouchers as they allow for repeatable scientific research. In DROP,  
247 this goal is facilitated through a consolidated digital infrastructure of data associated  
248 with laboratory strains, offering the opportunity for researchers to re-examine past  
249 experimental results in a permanent context. The third aim is to provide an up-to-date  
250 catalogue of the diversity of *Drosophila* parasitoids as a foundation for advancing the  
251 understanding of their taxonomy. Finally, the fourth aim of DROP is for our collaborative  
252 effort to serve as an inspiration to communities of researchers studying other groups of  
253 organisms who are experiencing difficulties with the reliability of molecular reference  
254 databases.

255

## 256 **Materials and Methods**

### 257 ***Data sources***

258 To assemble the DROP database, we targeted 20 wasp genera that potentially  
259 parasitize frugivorous *Drosophila* species. We compiled DNA sequence and voucher data  
260 from four sources: 1) museum collections, 2) publications, for which we selected the  
261 reference with taxonomist or parasitoid biologists as coauthors to ensure reliable  
262 species identity, 3) molecular biodiversity inventories publicly available in BOLD and

263 GenBank, for which we managed to secure inspection of the vouchers by taxonomists,  
264 and 4) a sequencing and taxonomic inventory of laboratory strains we conducted.

265 We first gathered species information into a catalogue of *Drosophila* parasitoid  
266 species (Table 1) from 216 references (see DROP database reference table) and 36  
267 institutes (Table S2). To ensure reliable names for nominal species (sequences identified  
268 by a species name) in our database, we confirmed their taxonomic validity using the  
269 Ichneumonoidea 2015 digital catalogue (Yu et al., 2016) and Hymenoptera Online (HOL;  
270 <http://hol.osu.edu/>), both of which are curated by taxonomic experts. To obtain reliable  
271 molecular identification data, we harvested 8,298 DNA sequences from GenBank and  
272 BOLD (all compiled in BOLD as DS-DROPAR dataset [dx.doi.org/10.5883/DS-DROPAR](https://dx.doi.org/10.5883/DS-DROPAR)). As  
273 of writing, these sequences represented 445 Barcode Index Numbers (BINs – a form of  
274 dynamic provisional taxa in BOLD, more detail in Ratnasingham & Hebert 2013), and  
275 211 named taxa.

276 The majority of the harvested sequences were Braconidae (6690), Diapriidae  
277 (967), Figitidae (622), and Pteromalidae (19). Because of the concerns with generic  
278 databases (noted above and in Figure 1 and Table S1), we assembled a list of sequences  
279 with valid species names that could either be traced back to vouchers examined by  
280 taxonomists or were referred to directly in publications authored by a recognized expert  
281 in the relevant taxon group. We then cross-checked species names with their  
282 corresponding BINs in BOLD and flagged potential conflicts between species names and  
283 BINs (Table S1).

284 A core goal of DROP besides that of a tool for biodiversity research is to function as a  
285 platform that accommodates *Drosophila* parasitoids kept in laboratory strains (for  
286 experimental work) or cultures in quarantine facilities (for biological control  
287 applications). So far, there has been a lack of a coherent and reliable means of verifying  
288 identification of species kept in laboratory settings, which can be a serious problem.  
289 Since lab cultures are routinely contaminated by neighboring cultures (e.g., through  
290 escapees), one species may be displaced by another even under a vigilant eye.

291 For lab and quarantine lines in DROP, we deposited DNA extractions and vouchers in  
292 the National Insect Collection, National Museum of Natural History, Smithsonian  
293 Institution (USNM; Washington, DC, USA). During their initial assembly of DROP,  
294 laboratory OTUs (operational taxonomic unit) were designated by their strain name;  
295 most laboratory strains can be associated with provisional species, but some cannot yet  
296 be assigned. Three females and three males of each strain were dry-mounted and  
297 individually assigned a USNMMENT 'QR code' specimen label as representative vouchers.  
298 For each molecular voucher, three legs from a female wasp were removed for DNA  
299 extraction and sequencing (Supplementary Methods for details), and the rest of the  
300 body was assigned a USNMMENT specimen label and preserved for morphological  
301 identification. Both DNA extraction and vouchers were entered into the database and  
302 uploaded to BOLD (DROP project: DS-LABS [dx.doi.org/10.5883/DS-LABS](https://dx.doi.org/10.5883/DS-LABS)) with an  
303 associated GenBank ID.

304 Where possible, we identified OTU strains using a combination of morphological and  
305 sequence data, and characterized provisional species or species clusters using neighbor-

306 joining trees (Figure S1) based on the COI gene sequences (Supplemental material). For  
307 establishing BIN limits in the context of DROP, we have adopted an initial percent cutoff  
308 at 2%. We acknowledge that 2% genetic diverge cutoffs (or BINs) are unlikely to work  
309 well across range of widely distributed species (Lin et al., 2015). But as Ratnasingham &  
310 Hebert (2013) pointed out, 2% is a good starting point for many taxa, also it may need to  
311 be adjusted as more samples are acquired and compared. Note that we use the term  
312 “OTU” as a general and neutral designation encompassing described species, provisional  
313 species, undescribed species, and cryptic species.

314

#### 315 ***Drosophila parasitoid database—DROP***

316 To compile the above information, we built a simple Structured Query Language  
317 (SQL) database in sqlite3 format using SQLiteStudio (step by step user instruction in  
318 supplemental material). Sqlite3 is a cross-platform format which can be also be opened  
319 using a number of other programs. There are eight linked tables in the database —  
320 species, strain, voucher, sequence, genome, transcriptome, proteome and reference —  
321 along with additional tables for linking these to reference table (Figure S2). The  
322 database incorporates all sample fields used by BOLD for compatibility and includes a  
323 number of new fields to accommodate a catalogue of *Drosophila* parasitoid species,  
324 laboratory strain information, and links from the DROP database to BOLD and GenBank  
325 records.

326 DROP is available on Zenodo (<http://doi.org/10.5281/zenodo.4519656>) for  
327 permanent deposition and version control. In addition to the main database, the

328 Zenodo repository includes additional files to facilitate easy use of the database. These  
329 files include: 1) the reference database in comma-separated text (.csv) and FASTA  
330 format ready to be used for molecular identification; 2) a species catalogue with  
331 taxonomic information; and 3) a list of laboratory strains with confirmed molecular  
332 vouchers. DROP will be continued to be curated and maintained by C-HL at the Zenodo  
333 repository and sequences generated in the future will also be deposited in BOLD (DROP  
334 project). If the curator changes, this will be announced in the README.md file in Zenodo  
335 repository. As the database relies on vouchers, we will aim for it to be continued to be  
336 maintained by taxonomists with direct access to museums.

337

### 338 ***Species, provisional species, and OTU designations***

339 In addition to the inherent value of a formal taxonomic name, a reliable provisional  
340 taxon label can also be used for exchanging scientific information and conveying  
341 experimental results among researchers (Schindel & Miller, 2010). Based on the amount  
342 of sequence divergence between described species, we observed what appears to be a  
343 significant number of provisional OTUs in the initial dataset we compiled. Furthermore,  
344 among the data linked to a valid species name, some of these provisional OTUs are  
345 actively being used in research and have sequences available to the public. We  
346 therefore provide a list of provisional species (potential new species) with their  
347 molecular vouchers.

348 We use the following designation format for OTUs that refer to a provisional species:  
349 “Drop\_strainX\_sp.1” or, when no other information is known, “DROP\_sp.1”. Where



350 possible, these OTUs are linked to a voucher USNM specimen label number. If the genus  
351 of the OTU is known, the “Drop\_Leptopilina\_sp.1” format is followed. These  
352 designations can facilitate species identification as well as discovery and description of  
353 new species without compromising the existing taxonomy of the described OTUs in  
354 question. As more complete species descriptions become available, this provisional  
355 species framework can be updated while keeping the link to previous provisional species  
356 name through deposited vouchers.

357

## 358 **Results**

### 359 ***Overview of DROP***

360 We catalogued 183 OTUs in the DROP database with 114 described species of  
361 *Drosophila* parasitoids and 69 provisional species (Table 1). In total, we documented 154  
362 laboratory strains (Table S3), and 853 vouchers from 36 institutions (Table S2). Among  
363 the described species, 98 have voucher information, of which 61 are traceable to type  
364 specimens, including 45 to holotypes (i.e., specimen used to root a name to the  
365 taxonomic author’s concept of the species). *Leptopilina* is represented by the highest  
366 number of species with 45 OTUs, followed by *Asobara* with 26 OTUs. Within the 154  
367 catalogued lab strains, 86 were actively being used in ongoing research (i.e., a live strain  
368 being cultivated). These strains represent 39 OTUs: 11 described species and 28  
369 provisional species (Table S3, Figure S1).

370

### 371 ***Molecular Vouchers***

372        So far, DROP includes 545 DNA sequences and links to 16 genomes (Table S4), 14  
373 transcriptomes (Table S5), and 6 proteomes (Table S6). From the total of 8298 DNA  
374 sequences (BOLD dataset: DS-DROPAR) collected from public databases, only 322  
375 sequences (less than 4% of available sequences) satisfied the reliability criteria we  
376 imposed for molecular vouchers to be included in DROP (see Materials and Methods).  
377 The DS-DROPAR dataset [dx.doi.org/10.5883/DS-DROPAR](https://doi.org/10.5883/DS-DROPAR) initially referred to 211 taxon  
378 names, but only 52 names were valid, linked to vouchers, or linked to a publication with  
379 evidence that the specimens had been identified by taxonomists. The remaining 223 of  
380 545 DROP DNA sequences were generated by DROP project (datasets: DS-LABS  
381 [dx.doi.org/10.5883/DS-LABS](https://doi.org/10.5883/DS-LABS) and DS-AUSPTOID [dx.doi.org/10.5883/DS-AUSPTOID](https://doi.org/10.5883/DS-AUSPTOID)) and  
382 came from 121 OTUs (101 lab strains and 12 provisional species).

383        The DROP database is largely made up of standard barcode COI sequences (349  
384 sequences), which includes 77 OTUs: 43 described species and 33 provisional species.  
385 We aimed to supplement COI with secondary markers (28SD2, 18S, ITS2) when possible,  
386 resulting in an additional 120 sequences from 26 OTUs: 15 described species and 11  
387 provisional species. There are currently 19 OTUs that have sequences from more than  
388 one genetic marker.

389

### 390 ***Species Delimitation in Laboratory Strains***

391        We used 298 COI sequences to resolve the identification of each laboratory  
392 strain, and where possible, indicated potential species clusters (Fig. S1 and Table S3).  
393 Using a fixed 2% divergence cutoff, a total of 31 lab strain OTUs were assignable to a

394 valid species name, and the remaining 70 strain OTUs were assigned to a provisional  
395 species. The taxonomic status of several of these provisional species is also being  
396 investigated using an integrative taxonomic approach involving morphological  
397 identification, genomic data, or other genetic data.

398

### 399 **Discussion**

400 In this paper, we introduce and describe a free and open-access database for the  
401 reliable molecular identification of *Drosophila* parasitoids. The guiding principle of DROP  
402 is data credibility, based on the prerequisite that genetic data are explicitly associated  
403 with voucher specimens and taxonomic concepts of the original authors (Troudet et al.,  
404 2018). When incorporating information from public genetic databases, we included only  
405 sequences that have passed our filtering protocol. This protocol ensures each entry is  
406 associated with a valid scientific name, provisional name, or consistently applied OTU  
407 designation that can be used to integrate genetic and organismal data from  
408 independent studies.

409 The following discussion expands on the utility of DROP and how we hope it will  
410 benefit molecular species identification, connect research from various disciplines,  
411 support biological control applications, and serve as a long-term molecular voucher  
412 repository and clearinghouse for vetted data. We also provide specific guidance for  
413 users how best to refer to DROP in their publications to allow cross-linking between  
414 studies.

415

416 ***Molecular (mis-)identification***

417 We observe that 17% of the described *Drosophila* parasitoid OTUs in BOLD and  
418 GenBank (dataset: DS-DROPAR) are associated with more than one BIN; these are  
419 examples of BIN-ID conflict. Roughly half of these OTUs are used as lab strains. This  
420 latter observation is disturbing, because it demonstrates that the criteria used to  
421 differentiate and reference species in active research programs are clouded. For  
422 example, BIN-ID conflicts were observed in the *Drosophila* parasitoids *Ganaspis*  
423 *brasiliensis* (Ihering) and *Asobara japonica* Belokobylskij (Table S1), both of which are in  
424 active use in numerous research programs (e.g. Moreau et al., 2009; Nomano et al.,  
425 2017; Reumer et al., 2012; Wang et al., 2020a & 2021) as well as in biological control  
426 efforts against the invasive *D. suzukii* (e.g. Abram et al., 2020; Daane et al., 2016;  
427 Giorgini et al., 2019). All the BINs from *G. brasiliensis* carry the name *G. xanthopoda*  
428 (Figure 1). In such instances, assigning an identification by matching specimens to  
429 barcode records in the genetic database is problematic, as two names are applied to the  
430 same BIN. If sequences comprising the BIN are not linked to a voucher that can be  
431 examined, teasing apart the two names and how they are applied is impossible.  
432 Applying explicit, consistent criteria for species determination ensures that  
433 experimental results can be reliably repeated, and that any potentially novel  
434 observations will not be explained away as artifacts of identification. DROP addresses  
435 these concerns by linking reliable reference sequences and vouchers for *G. brasiliensis*  
436 (Figure 1) between different studies: one with reference to the morphological

437 description (Buffington & Forshage, 2016) and the other with reference to the genome  
438 (using voucher specimens from the morphological study; Blaimer et al., 2020).

439 We were not able to resolve all conflicts between BIN and species identity, for one  
440 or more of the following three reasons: First, many records lack reliably identified  
441 vouchers and have often been themselves used for molecular identification,  
442 proliferating errors. Second, in some cases, it is not possible to verify whether the  
443 genetic differences among BINs represent different species or simply intraspecific  
444 genetic variation (Bergsten et al., 2012), because BINs themselves are not a species  
445 concept. The only solution to this problem is to derive original sequence data from type  
446 specimens (which is often either impractical or impossible for a number of technical  
447 reasons), or from specimens whose conspecificity with the types has been corroborated.  
448 Since species boundaries are always subject to testing, additional specimens from  
449 multiple collecting events (ideally representing different seasons and geographic  
450 regions) may help provide the additional data to circumscribe a given species' limits. The  
451 third difficulty in resolving BIN-ID conflict derives from the data themselves: Although  
452 the mitochondrial COI gene is the locus most frequently chosen for identification of  
453 insects and other animals, its effectiveness varies among insect groups (Brower &  
454 DeSalle, 2002; Gompert et al., 2008; Lin & Danforth, 2004). In part, this derives from  
455 gene-tree/species-tree conflict as a function of mitochondrial DNA introgression  
456 (Gompert et al., 2008; Klopstein et al., 2016), parthenogenesis (Reumer et al., 2012),  
457 and/or *Wolbachia* infection (Ferrer-Suay et al., 2018; Wachi et al., 2015; Xiao et al.,  
458 2012), any of which may lead to complications in species delimitation using

459 mitochondrial loci. Ideally, studies should apply multiple loci, genomes, and comparative  
460 taxonomic data to clarify species boundaries. As *Drosophila* parasitoids are often  
461 maintained in laboratory cultures, it is also possible to use mating experiments to  
462 explore species boundaries under the paradigm of the biological species concept  
463 (Seehausen et al., 2020).

464

#### 465 ***DROP as a taxonomic tool***

466 DROP offers an empirical platform for species discovery and a useful tool for  
467 taxonomic research. The fact that the number of BINs reported here exceeds the  
468 number of described species (Table S1, Figure S3) highlights the need for taxonomic  
469 work. But such work cannot proceed on the basis of BINs or barcodes, but requires  
470 integrative taxonomic approach employing a combination of molecular and  
471 morphological data. Describing new species on the sole basis of a barcode or BIN,  
472 without the benefit of independent character data, should, in general, be avoided  
473 (Meier et al., 2021). It risks creating nomenclatural synonymy if it is later determined  
474 that a sequence can be attributed to a specimen that bears a valid, available name.  
475 Moreover, BINs are based on distance analyses which, by definition, are incompatible  
476 with diagnoses per se (Ferguson, 2002; Prendini et al., 2002; Goldstein & DeSalle, 2011).  
477 Therefore, in taxonomic treatments, it is critical to clarify the range of applicability of a  
478 given BIN and its overlap with a taxonomic name (see example in Figure 1). DROP allows  
479 cross-linking between studies and therefore provides researchers with valuable tools for

480 taxonomic revisions, including the means of discovery, corroboration, and description of  
481 new species.

482

483 ***How to use DROP to ensure cross-linking between studies and reliable molecular***  
484 ***identification?***

485       Public genetic databases have adopted a longstanding convention in treating  
486 undetermined OTUs and sequences, referring to provisional species with numbers, as  
487 for example “sp. 1”, and these are rarely linked to vouchers. For OTUs designated as  
488 provisional species, DROP enables cross-indexing of specimens, sequences and  
489 references between any studies (ecological, taxonomic, evolutionary, genetic, etc). The  
490 best way to ensure cross-linking is depositing a voucher in DROP, together with a  
491 sequence or genome from the same individual (or individual from the same strain or  
492 series). For example, one can write:

493

494       *Provisional species “drop\_Gan1\_sp.1” refers to voucher USNMENT01557320*  
495 *deposited in the USNM, Washington DC, COI sequence (DROP sequence\_id: 2, BOLD*  
496 *Process ID: DROP143-21), 28SD1 sequence (DROP sequence\_id: 289), and 28SD2*  
497 *sequence (DROP sequence\_id: 303).*

498

499       Similarly, laboratory strains can be reported in the same way, just adding the  
500 DROP lab strain\_id. It is important to periodically recheck identification of laboratory  
501 strains as cultures are easily cross-contaminated, and deposit vouchers of laboratory

502 strains associated with experiments to DROP. In the future, when e.g.  
503 “drop\_Gan1\_sp.1” is described as a new species with a formal specific epithet, DROP  
504 curator will update the species status and holotype information while keeping this  
505 provisional species name as an informal “synonym.”

506 A weaker and thus much less preferred way of cross-linking is to state in the  
507 study that the identification of organisms was performed based on molecular  
508 identification match of a sequence to DROP sequences. This is the only available option  
509 for environmental DNA studies. For example, one can write:

510

511 *Provisional species “drop\_Gan1\_sp.1” was identified based on 99.9% blast match*  
512 *of COI to DROP sequence\_id: 2 (BOLD Process ID: DROP143-21).*

513

514 DROP deposition in Zenodo allows referencing of DROP either through general  
515 doi (the doi we use throughout this paper), which takes the user always to the latest  
516 database version, or through a doi specific to DROP version. When referencing DROP  
517 please primarily cite this paper, but for reproducibility it is also good practice to include  
518 doi of the specific DROP version used.

519 There are two basic ways of molecular identification which should ideally be  
520 used in combination: sequence matching (blast), and tree-building methods which  
521 investigate membership to a cluster. Further, there are a number of decisions to be  
522 made with each method, concerning locus (or loci) and thresholds. DROP leaves these  
523 decisions up to the users, only provides raw sequences or links to them. Practically, the



524 choice of loci is currently mostly limited to COI, but in the future it is likely that  
525 molecular identifications will be based on multiple loci or whole genomes. Over time we  
526 will also get a better idea about what thresholds are more appropriate than a fixed 2%  
527 cut off. For rarer parasitoid genera which attack also other hosts besides *Drosophila*  
528 (e.g. *Opius*, or *Spalangia* wasps) we suggest caution in the identification using only  
529 DROP sequences as DROP does not include all sequences from these genera, but just  
530 from species which are already known to attack *Drosophila*.

531

### 532 ***From molecular mechanisms to ecosystem structure***

533 The use of molecular tools in insect biodiversity studies has gradually expanded from  
534 barcoding single individuals to metabarcoding large environmental samples  
535 representing entire food webs (Jeffs et al., 2020; Littlefair et al., 2016). *Drosophila* and  
536 their parasitoids are among the few systems that currently allow us to explore  
537 thoroughly the mechanisms of species interactions at scales ranging from the molecular  
538 to the ecological. Here, we highlight two examples where information compiled in DROP  
539 enables the study of the *Drosophila*-parasitoid system across multiple levels of biological  
540 organization:

541 DROP includes a DNA reference library of Australian *Drosophila* parasitoids (dataset:  
542 DS-AUSPTOID [dx.doi.org/10.5883/DS-AUSPTOID](https://doi.org/10.5883/DS-AUSPTOID)) that connects laboratory experiments  
543 and field research. Molecular vouchers of both hosts and parasitoids were collected  
544 along altitudinal gradients in the rainforest of northern Queensland, Australia (Jeffs et  
545 al., 2021). With this DNA reference library, researchers can detect interactions between

546 *Drosophila* and their parasitoids using PCR-based approaches and parasitized pupae  
547 (Hrcek & Godfray, 2015; Jeffs et al., 2020). Surveying host-parasitoid interactions in this  
548 way will improve our understanding of how environmental change alters the structure  
549 of host-parasitoid networks (Morris et al., 2014; Staniczenko et al., 2017; Tylanakis et  
550 al., 2007) by accelerating data collection in the field. In addition, JH established lab  
551 cultures of both hosts and their parasitoids from the same Australian sampling sites with  
552 the aim of conducting laboratory experiments (e.g. Thierry et al., 2021). Molecular  
553 vouchers of the lab strains were then submitted to DROP as a reference database  
554 (datasets: DS-LABS [dx.doi.org/10.5883/DS-LABS](https://dx.doi.org/10.5883/DS-LABS)) to ensure that criteria for species  
555 determination were applied consistently—and will continue to be applied consistently—  
556 between the natural community studies and the laboratory experiments.

557       The presence of a foundational DNA reference library and species catalogue in  
558 DROP will enable the process of exploring parasitoid biodiversity to become more  
559 efficient. For example, DROP includes molecular vouchers from *Drosophila* parasitoids  
560 that were collected across seasons and along latitudinal gradients in the eastern United  
561 States (Lue et al., 2016, 2018). These data proved to be extremely useful for identifying  
562 species in a more recent exploration of native parasitoid biodiversity across North  
563 America (e.g., Abram et al., 2020). There are additional uses for DROP: curated  
564 specimen collections may be used to document species distributions, phenology,  
565 understand micro-evolutionary patterns, observe the effects of climate change, and  
566 detect and track biological invasions (Funk, 2018; Schilthuizen et al., 2015; Tarli et al.,  
567 2018).

568

569 ***Taxonomic accuracy for biocontrol studies***

570       Unfortunately, the history of biological control includes many examples of  
571 misidentifications that have resulted in failures to employ or establish the expected  
572 control agent, thus hindering eventual success (Buffington et al., 2018; Rosen, 1986;  
573 Huffaker et al. 1962). In the context of biological control research on *Drosophila* pest  
574 species, a simple, reliable, and rapid identification tool for their natural enemies is  
575 essential (Wang et al. 2020b). By anchoring the criteria for determining identities of  
576 organisms being considered for biological control programs, DROP annotation enables  
577 the direct examination of centers of origin for parasitoid species, their co-occurrence  
578 with natural enemies, and the optimal timing for potential introductions of such  
579 enemies (Abram et al., 2020; Daane et al., 2016; Girod et al., 2018a and b; Kimura, 2015;  
580 Mitsui et al., 2007). Because most sequences from DROP are already vetted for  
581 reliability, they can be used to identify biological control agents rapidly, before or after  
582 being brought into quarantine facilities for safety and efficacy testing. This will decrease  
583 the risk of non-target ecological impacts arising from misidentifications and facilitate  
584 regulatory review for releases of effective and specific natural enemies.

585       In addition to species identification, reference sequences from DROP may be used as  
586 a starting point to create species-specific primers for the accurate identification of  
587 parasitoids, design multiplex PCR assays that rapidly distinguish species in natural or  
588 agricultural ecosystems (Ye et al., 2017), and apply high-throughput molecular  
589 identification diagnostics (Fagan-Jeffries et al., 2018).

590

591 ***Long-term molecular voucher preservation***

592       During the curation of DROP, we found that holotype specimens were missing from  
593 museums for several iconic *Drosophila* parasitoid species: *Asobara tabida* (Nees von  
594 Esenbeck), *Leptopilina clavipes* (Hartig), and *Leptopilina longipes* (Hartig). This is not  
595 uncommon and impedes future taxonomic revisions regardless of whether or not  
596 molecular data are used. To avoid contributing to this problem, DROP uses museums as  
597 depositories for ensuring that sequenced vouchers of both described species and  
598 provisional species are permanently stored. In order to stabilize nomenclature, we  
599 further advocate the designation of neotypes (a replacement specimen for a missing  
600 holotype or type series) that have museum-vouchered DNA barcodes and additional  
601 genomic extractions in storage.

602       Natural history museums are designed to maintain vouchers (including types) for  
603 long-term preservation, and increasingly they implement institutionalized workflows  
604 that link DNA sequences to specimens and specimen metadata (Prendini et al., 2002).  
605 We strongly encourage the deposition of voucher specimens from field surveys and  
606 experimental studies in museum collections, as has been urged by the Entomology  
607 Collections Network (ECN) and required in many PhD programs. No matter how quickly  
608 new molecular techniques are developed or refined, there is no substitute for a reliable  
609 database of voucher specimens when it comes to ensuring the repeatability of biological  
610 research (Funk et al., 2005; Lendemer et al., 2020).

611 Our results show that species richness of the parasitic wasps that attack *Drosophila*  
612 is severely underestimated, and only a fraction of them have been described. In DROP,  
613 38% of the OTUs are provisional species, and more than 46% of the named OTUs have  
614 synonyms. Remarkably, *Leptopilina heterotoma*, one of the world's most studied  
615 parasitoids, has more than 20 synonyms! As is generally the case, the rate of species  
616 description and revision of *Drosophila* parasitoids lags far behind that with which  
617 molecular sequence data are generated. Ensuring a consistent application of OTU  
618 recognition is therefore essential. With DROP, researchers may ensure consistency in  
619 their application of scientific names, and that those names are valid, making the  
620 daunting process of describing *Drosophila* parasitoids more accurate and efficient. In  
621 addition to the collection of physical museum resources, a central role taxonomists play  
622 in DROP and its curation is that of fostering better integration of taxonomy with  
623 experimental and biodiversity research. Our intention is to perpetuate DROP beyond  
624 this introductory publication. We hope that experts in all areas of *Drosophila*-parasitoid  
625 biology and related fields will join us in this effort.

626

## 627 **Conclusion**

628 Taxonomic confusion presents many obstacles in experimental and biodiversity  
629 studies. One way of addressing this impediment is to provide a reliable DNA library with  
630 traceable vouchers (Astrin et al., 2013). Compared to BOLD and GenBank, DROP is a  
631 small database that provides some advantages over an immense genetic database. For  
632 example, it is easier for the research community to have direct communication amongst

633 themselves, when there is a strong focus on a few specific taxa (Weigand et al., 2019). A  
634 good database has to maintain good quality of molecular data, but even more  
635 challenging is to maintain quality of identification from different sources (Fontes et al.,  
636 2021). In a big database, setting up a universal standard that satisfied all the taxa and  
637 researchers desires is particularly challenging. The curated nature of DROP will allow us  
638 to make strong rules to govern this data and assure users of its fidelity. While GenBank  
639 and BOLD each perform some amount of curation, it could be difficult to agree on  
640 curators for the whole range of animal and plant species catalogued there. We  
641 developed DROP as a resource and platform for gathering and sharing reliable genomic  
642 sequence data for *Drosophila* parasitoids. We hope it will serve as a model for  
643 researchers working with organisms which present similar difficulties. While compiling  
644 DROP, we found that the high number of provisional *versus* named OTUs suggests that  
645 the diversity of parasitic wasps attacking *Drosophila* is greatly underestimated. With this  
646 in mind, DROP represents the start of an important knowledge base that will strengthen  
647 future studies of natural host-parasitoid interactions, population dynamics, biocontrol,  
648 and the impact of climate change on biodiversity and ecosystem services.

649

## 650 **Acknowledgements**

651 The idea of DROP project was developed during the 2018 Entomological Society  
652 of America conference, during the symposium “*Drosophila* parasitoids: from molecular  
653 to ecosystem level”. We thank Dr. Elijah Talamas for valuable comments on earlier  
654 drafts and Dr. Vid Bakovic for genomic consultation on this project. We also thank Chris

655 Jeffs for providing some Australian field samples. We are thankful for funding support  
656 from the Czech Science Foundation (17-27184Y). Additional fund for sequencing was  
657 provided by MLB, OTL, and PPAS. Mention of trade names or commercial products in  
658 this publication is solely for the purpose of providing specific information and does not  
659 imply recommendation or endorsement by the USDA. USDA is an equal opportunity  
660 provider and employer.

661

## 662 **References**

- 663 Abram, P. K., Mcpherson, A. E., Kula, R., Hueppelsheuser, T., Perlman, S. J., Curtis, C. I.,  
664 Fraser, J. L., ... Buffington, M. (2020). New records of *Leptopilina*, *Ganaspis*, and  
665 *Asobara* species associated with *Drosophila suzukii* in North America, including  
666 detections of *L. japonica* and *G. brasiliensis*. *Journal of Hymenoptera Research*, 78,  
667 1-17, <https://doi.org/10.3897/jhr.78.55026>
- 668 Astrin, J. J., Zhou, X., & Misof, B. (2013). The importance of biobanking in molecular  
669 taxonomy, with proposed definitions for vouchers in a molecular context. *ZooKeys*,  
670 365(SPEC.ISSUE), 67–70. <https://doi.org/10.3897/zookeys.365.5875>
- 671 Baker, C. C. M., Bittleston, L. S., Sanders, J. G., & Pierce, N. E. (2016). Dissecting host-  
672 associated communities with DNA barcodes. *Philosophical Transactions of the*  
673 *Royal Society B: Biological Sciences*, 371(1702).  
674 <https://doi.org/10.1098/rstb.2015.0328>
- 675 Bergsten, J., Bilton, D. T., Fujisawa, T., Elliott, M., Monaghan, M. T., Balke, M.,  
676 Hendrich, ... Vogler, A. P. (2012). The effect of geographical scale of sampling on  
677 DNA barcoding. *Systematic Biology*, 61 (5), 851-869.  
678 <https://doi.org/10.1093/sysbio/sys037>
- 679 Blaimer, B. B., Gotzek, D., Brady, S. G., & Buffington, M. (2020). Comprehensive  
680 phylogenomic analyses re-write the evolution of parasitism within cynipoid wasps.  
681 *BMC Ecology and Evolution*, 20 (155). <https://doi.org/10.1186/s12862-020-01716-2>
- 682 Brower, A. V. Z., & DeSalle, R. (2002). Patterns of mitochondrial versus nuclear DNA  
683 sequence divergence among nymphalid butterflies: The utility of wingless as a  
684 source of characters for phylogenetic inference. *Insect Molecular Biology*, 7 (1), 73-  
685 82. <https://doi.org/10.1046/j.1365-2583.1998.71052.x>
- 686 Buffington, M., & Forshage, M. (2016). Redescription of *Ganaspis brasiliensis* (Ihering,  
687 1905), new combination, (Hymenoptera: Figitidae) a natural enemy of the Invasive  
688 *Drosophila suzukii* (Matsumura, 1931) (Diptera: Drosophilidae). *Proceedings of the*  
689 *Entomological Society of Washington*, 118(1), 1–13. <https://doi.org/10.4289/0013-8797.118.1.1>
- 690

- 691 Buffington, M., Talamas, E. J., & Hoelmer, K. A. (2018). Team Trissolcus: Integrating  
692 taxonomy and biological control to combat the brown marmorated stink bug.  
693 *American Entomologist*, 64 (4), 224–232
- 694 Carton, Y., Boulétreau, M., van Alphen, J. J. M., & van Lenteren, J. C. (1986). The  
695 *Drosophila* parasitic wasps. In Ashburner M, Carson HL, Thompson JN (Eds), *The*  
696 *genetics and biology of Drosophila*, (3),348–394.
- 697 Carton, Y., Haouas, S., Marrakchi, M., & Hochberg, M. (1991). Two competing parasitoid  
698 species coexist in sympatry. *Oikos*, 60, 222-230. <https://doi.org/10.2307/3544869>
- 699 Condon, M. A., Scheffer, S. J., Lewis, M. L., Wharton, R., Adams, D.C., & Forbes, A. A.  
700 (2014). Lethal interactions between parasites and prey increase niche diversity in a  
701 tropical community. *Science*, 343(6176), pp.1240-1244.
- 702 Daane, K. M., Wang, X.-G., Biondi, A., Miller, B. E., Miller, J. C., Riedl, H., Shearer, P. W.,  
703 ... Walton, V. M. (2016). First exploration of parasitoids of *Drosophila suzukii* in  
704 South Korea as potential classical biological agents. *Journal of Pest Science* 89, 823–  
705 835, doi:10.1007/s10340-016-0740-0.
- 706 Dolphin, K., & Quicke, D. L. J. (2001). Estimating the global incompletely described  
707 parasitoid wasps. *Biological Journal Of The Linnean Society*, 73 (3), 279-286,  
708 <https://doi.org/10.1006>
- 709 Escalante, P., Ibarra-Vazquez, A., & Rosas-Escobar, P. (2010). Tropical montane  
710 nymphalids in Mexico: DNA barcodes reveal greater diversity. *Mitochondrial DNA*,  
711 21, 30-37, <https://doi.org/10.3109/19401736.2010.535527>
- 712 Ferrer-Suay, M., Staverløkk, A., Selfa, J., Pujade-Villar, J., Naik, S., & Ekrem., T. (2018)  
713 Nuclear and mitochondrial markers suggest new species boundaries in *Alloxysta*  
714 (Hymenoptera: Cynipoidea: Figitidae). *Arthropod Systematics & Phylogeny*, 76(3),  
715 463-473, doi:10.5883/DSALLOXYST
- 716 Fagan-Jeffries, E. P., Cooper, S. J. B., Bertozzi, T., Bradford, T. M., & Austin, A. D. (2018).  
717 DNA barcoding of microgastrine parasitoid wasps (Hymenoptera: Braconidae) using  
718 high-throughput methods more than doubles the number of species known for  
719 Australia. *Molecular Ecology Resources*, 18(5), 1132–1143.  
720 <https://doi.org/10.1111/1755-0998.12904>
- 721 Ferguson, J. W. H. (2002). On the use of genetic divergence for identifying species.  
722 *Biological Journal of the Linnean Society*, 75, 509–16.
- 723 Forbes, A. A., Bagley, R. K., Beer, M. A., Hippee, A. C., & Widmayer, H. A. (2018).  
724 Quantifying the unquantifiable: Why Hymenoptera, not Coleoptera, is the most  
725 speciose animal order. *BMC Ecology*, 18(1), 1–11. [https://doi.org/10.1186/s12898-](https://doi.org/10.1186/s12898-018-0176-x)  
726 018-0176-x
- 727 Fontes, J. T., Vieire, P. E., Ekrem, T., Soares, P., & Costa, F. O. (2021). BAGS: An  
728 automated barcode, audit & grade system for DNA barcode reference libraries.  
729 *Molecular Ecology Resources*, 21(2), 573-583. [https://doi.org/10.1111/1755-](https://doi.org/10.1111/1755-0998.13262)  
730 0998.13262
- 731 Funk, V. A. (2018). Collections-based science in the 21st Century. *Journal of Systematics*  
732 *and Evolution*, 56(3), 175–193. <https://doi.org/10.1111/jse.12315>
- 733 Funk, V. A., Hoch, P. C., Prather, L. A., & Wagner, W. L. (2005). The importance of  
734 vouchers. *Taxon*, 54(1), 127–129. <https://doi.org/10.2307/25065309>



- 735 Gariepy, T. D., Bruin, A., Konopka, J., Scott-Dupree, C., Fraser, H., Bon, M. C., & Talamas,  
736 E. (2019). A modified DNA barcode approach to define trophic interactions  
737 between native and exotic pentatomids and their parasitoids. *Molecular Ecology*,  
738 28(2), 456–470. <https://doi.org/10.1111/mec.14868>
- 739 Giorgini, M., Wang, X.-G., Wang, Y., Chen, F. S., Hougardy, E., Zhang, H. M., Chen, Z.  
740 Q., ... Guerrieri, E. (2019). Exploration for native parasitoids of *Drosophila suzukii* in  
741 China reveals a diversity of parasitoid species and narrow host range of the  
742 dominant parasitoid. *Journal of Pest Science*, 92(2), 509–522.  
743 <https://doi.org/10.1007/s10340-018-01068-3>
- 744 Girod, P., Borowiec, N., Buffington, M., Chen, G., Fang, Y., Kimura, M. T., Peris-Felipo, F.  
745 J., ... Kenis, M. (2018). The parasitoid complex of *D. suzukii* and other fruit feeding  
746 *Drosophila* species in Asia. *Scientific Reports*, 8(1), e11839.  
747 <https://doi.org/10.1038/s41598-018-29555-8>
- 748 Girod, P., Liehmann, O., Urvois, T., Turlings, T. C. J., Kenis, M., & Haye, T. (2018). Host  
749 specificity of Asian parasitoids for potential classical biological control of *Drosophila*  
750 *suzukii*. *Journal of Pest Science* 91,1241–1250, [https://doi.org/10.1007/s10340-](https://doi.org/10.1007/s10340-018-1003-z)  
751 [018-1003-z](https://doi.org/10.1007/s10340-018-1003-z)
- 752 Goldstein, P. Z., & DeSalle, R. (2011). Integrating DNA barcode data and taxonomic  
753 practice: Determination, discovery, and description. *BioEssays*, 33(2),135-147,  
754 <https://doi.org/10.1002/bies.201000036>
- 755 Gompert, Z., Forister, M. L., Fordyce, J. A., & Nice, C. C. (2008). Widespread mito-nuclear  
756 discordance with evidence for introgressive hybridization and selective sweeps in  
757 *Lycaeides*. *Molecular Ecology*, 17(24), 5231-5244, [https://doi.org/10.1111/j.1365-](https://doi.org/10.1111/j.1365-294X.2008.03988.x)  
758 [294X.2008.03988.x](https://doi.org/10.1111/j.1365-294X.2008.03988.x)
- 759 Grissell, E. (1999). Hymenopteran biodiversity: some alien notions. *American*  
760 *Entomologist*, 45,236-244.
- 761 Hardy, I. C., van Alphen, J. J. M., & Godfray, H. C. J. (1994). Parasitoids: Behavioral and  
762 evolutionary ecology. *The Journal of Animal Ecology*, 63(4), 1009-1010,  
763 <https://doi.org/10.2307/5282>
- 764 Hausmann, A., Haszprunar, G., & Hebert, P. D. N. (2011). DNA barcoding the geometrid  
765 fauna of bavaria (Lepidoptera): Successes, surprises, and questions. *PLoS ONE*, 6(2),  
766 1–9. <https://doi.org/10.1371/journal.pone.0017134>
- 767 Hausmann, A., Miller, S. E., Holloway, J. D., Dewaard, J. R., Pollock, D., Prosser, S. W. J.,  
768 & Hebert, P. D. N. (2016). Calibrating the taxonomy of a megadiverse insect family:  
769 3000 DNA barcodes from geometrid type specimens (Lepidoptera, Geometridae).  
770 *Genome*, 59(9), 671–684. <https://doi.org/10.1139/gen-2015-0197>
- 771 Hebert, P. D. N., Ratnasingham, S., & DeWaard, J. R. (2003). Barcoding animal life:  
772 Cytochrome c oxidase subunit 1 divergences among closely related species.  
773 *Proceedings of the Royal Society B: Biological Sciences*, 270 (Suppl.), 96-99,  
774 <https://doi.org/10.1098/rsbl.2003.0025>
- 775 Hendrich, L., Morinière, J., Haszprunar, G., Hebert, P. D. N., Hausmann, A., Köhler, F., &  
776 Balke, M. (2015). A comprehensive DNA barcode database for Central European  
777 beetles with a focus on Germany: Adding more than 3500 identified species to  
778 BOLD. *Molecular Ecology Resources*, 15(4), 795-818, <https://doi.org/10.1111/1755->

- 779 0998.12354  
780 Hřček, J., & Godfray, H. C. J. (2015). What do molecular methods bring to host-parasitoid  
781 food webs? *Trends in Parasitology*, 31(1), 30–35.  
782 <https://doi.org/10.1016/j.pt.2014.10.008>  
783 Hřček, J., Miller, S. E., Quicke, D. L. J., & Smith, M. A. (2011). Molecular detection of  
784 trophic links in a complex insect host-parasitoid food web. *Molecular Ecology*  
785 *Resources*, 11(5), 786–794. <https://doi.org/10.1111/j.1755-0998.2011.03016.x>  
786 Huffaker, C. B., Kennett, C. E., Finney, G. L. (1962). Biological control of olive scale,  
787 *Pwrlatoria oleae* (Cohree), in California by imported *Aphytis maculicornis* (Masi)  
788 (Hymenoptera: Aphelinidae). *Hilgardia*, 32 (13): 541-636. DOI:  
789 10.3733/hilg.v32n13p541  
790 Hughes, R. D., Woolcock, L. T. (1976). *Aphaereta aotea* sp. N. (Hymenoptera:  
791 Braconidae), an Alysine parasite of dung breeding flies. *Journal of Australian*  
792 *Entomological Society*, 15, 191-196.  
793 Jeffs, C. T., Terry, J. C. D., Higgie, M., Jandová, A., Konvičková, H., Brown, J. J., Lue, C.-H.,  
794 ... Lewis, O. T. (2020). Molecular analyses reveal consistent food web structure with  
795 elevation in rainforest *Drosophila* - parasitoid communities. *Ecography*, 43, 1-11,  
796 <https://doi.org/10.1111/ecog.05390>  
797 Kim-Jo, C., Gatti, J. L., & Poirié, M. (2019). *Drosophila* cellular immunity against  
798 parasitoid wasps: A complex and time-dependent process. *In Frontiers in*  
799 *Physiology*, <https://doi.org/10.3389/fphys.2019.00603>  
800 Kimura, M. T. (2015). Prevalence of exotic frugivorous *Drosophila* species, *D. simulans*  
801 and *D. immigrans* (Diptera: Drosophilidae), and its effects on local parasitoids in  
802 Sapporo, northern Japan. *Applied Entomology and Zoology*, 50(4), 509–515.  
803 <https://doi.org/10.1007/s13355-015-0361-8>  
804 Kimura, M. T., & Mitsui, H. (2020). *Drosophila* parasitoids (Hymenoptera) of Japan. *In*  
805 *Entomological Science*, 23(4), 359-368, <https://doi.org/10.1111/ens.12432>  
806 Klopstein, S., Kropf, C., & Baur, H. (2016). *Wolbachia* endosymbionts distort DNA  
807 barcoding in the parasitoid wasp genus *Diplazon* (Hymenoptera: Ichneumonidae).  
808 *Zoological Journal of the Linnean Society*, 177(3), 541–557.  
809 <https://doi.org/10.1111/zoj.12380>  
810 Kraaijeveld, A. R., & Godfray, H. C. J. (1997). Trade-off between parasitoid resistance and  
811 larval competitive. *Nature*, 389, 278-280, <https://doi.org/10.1038/38483>  
812 Lefèvre, T., De Roode, J. C., Kacsoh, B. Z., & Schlenke, T. A. (2012). Defence strategies  
813 against a parasitoid wasp in *Drosophila*: Fight or flight? *Biology Letters*, 8(2), 230-  
814 233, <https://doi.org/10.1098/rsbl.2011.0725>  
815 Lendemer, J., Thiers, B., Monfils, A. K., Zaspel, J., Ellwood, E. R., Bentley, A., LeVan, K., ...  
816 Aime, M. C. (2020). The extended specimen network: A strategy to enhance US  
817 biodiversity collections, promote research and education. *BioScience*, 70(1), 23-30,  
818 <https://doi.org/10.1093/biosci/biz140>  
819 Lin, C. P., & Danforth, B. N. (2004). How do insect nuclear and mitochondrial gene  
820 substitution patterns differ? Insights from Bayesian analyses of combined datasets.  
821 *Molecular Phylogenetics and Evolution*, 30(3), 686-702,  
822 [https://doi.org/10.1016/S1055-7903\(03\)00241-0](https://doi.org/10.1016/S1055-7903(03)00241-0)

- 823 Lin, X., Stur, E., & Ekrem, T. (2015). Exploring genetic divergence in a species-rich genus  
824 using 2790 DNA barcodes. *PLoS ONE*, 10(9): e0138993.  
825 <https://doi.org/10.1371/journal.pone.0138993>
- 826 Littlefair, J. E., Clare, E. L., & Naaum, A. (2016). Barcoding the food chain: From Sanger to  
827 high-throughput sequencing1. *Genome*, 59(11), 946–958.  
828 <https://doi.org/10.1139/gen-2016-0028>
- 829 Lue, C.-H., Borowy, D., Buffington, M. L., & Leips, J. (2018). Geographic and seasonal  
830 variation in species diversity and community composition of frugivorous *Drosophila*  
831 (Diptera: Drosophilidae) and their *Leptopilina* (Hymenoptera: Figitidae) parasitoids.  
832 *Environmental Entomology*, 47(5): 1096-1106. <https://doi.org/10.1093/ee/nvy114>
- 833 Lue, C.-H., Driskell, A. C., Leips, J., & Buffington, M. L. (2016). Review of the genus  
834 *Leptopilina* (Hymenoptera, Cynipoidea, Figitidae, Eucoilinae) from the Eastern  
835 United States, including three newly described species. *Journal of Hymenoptera*  
836 *Research*, 53: 35-76. <https://doi.org/10.3897/jhr.53.10369>
- 837 Meiklejohn, K. A., Damaso, N., & Robertson, J. M. (2019). Assessment of BOLD and  
838 GenBank – Their accuracy and reliability for the identification of biological  
839 materials. *PLoS ONE*, 14(6): e0217084.  
840 <https://doi.org/10.1371/journal.pone.0217084>
- 841 Meier, R., Blaimer, B., Buenaventura, E., Hartop, E., von Thomas, R., Srivathsan, A., &  
842 Yeo, D. (2021) A re-analysis of the data in Sharkey et al.,'s (2021) minimalist  
843 revision reveals that BINs do not deserve names, but BOLD Systems needs a  
844 stronger commitment to open science. *bioRxiv*.  
845 <https://doi.org/10.1101/2021.04.28.441626>
- 846 Melk, J. P., & Govind, S. (1999). Developmental analysis of *Ganaspis xanthopoda*, a larval  
847 parasitoid of *Drosophila melanogaster*. *Journal of Experimental Biology*, 202, 1885-  
848 1896
- 849 Miller, S. E., Hausmann, A., Hallwachs, W., & Janzen, D. H. (2016). Advancing taxonomy  
850 and bioinventories with DNA barcodes. *Philosophical Transactions of the Royal*  
851 *Society Biological Sciences*, 371(1702): 20150339. doi: 10.1098/rstb.2015.0339
- 852 Mitsui, H., van Achterberg, K., Nordlander, G., & Kimura, M. T. (2007). Geographical  
853 distributions and host associations of larval parasitoids of frugivorous *Drosophilidae*  
854 in Japan. *Journal of Natural History*, 41(25–28), 1731–1738.  
855 <https://doi.org/10.1080/00222930701504797>
- 856 Moreau, S. J. M., Vinchon, S., Cherqui, A., & Prévost, G. (2009). Components of *Asobara*  
857 venoms and their effects on hosts. In *Advances in Parasitology*, Prévost G (Ed). 70,  
858 217-232, [https://doi.org/10.1016/S0065-308X\(09\)70008-9](https://doi.org/10.1016/S0065-308X(09)70008-9)
- 859 Morris, R. J., Gripenberg, S., Lewis, O. T., & Roslin, T. (2014). Antagonistic interaction  
860 networks are structured independently of latitude and host guild. *Ecology Letters*,  
861 17(3), 340-349, <https://doi.org/10.1111/ele.12235>
- 862 Nappi, A. J., & Carton, Y. (2001). Immunogenetic aspects of the cellular immune  
863 response of *Drosophila* against parasitoids. *Immunogenetics*, 52(3–4), 157–164.  
864 <https://doi.org/10.1007/s002510000272>
- 865 Nomano, F. Y., Kasuya, N., Matsuura, A., Suwito, A., Mitsui, H., Buffington, M.L., &  
866 Kimura, M. T. (2017). Genetic differentiation of *Ganaspis brasiliensis*

- 867 (Hymenoptera: Figitidae) from East and Southeast Asia. *Applied Entomology and*  
868 *Zoology*, 52(3), 429–437. <https://doi.org/10.1007/s13355-017-0493-0>
- 869 Novotny, V., & Miller, S. E. (2014). Mapping and understanding the diversity of insects in  
870 the tropics: Past achievements and future directions. *Austral Entomology*, 53(3),  
871 259–267. <https://doi.org/10.1111/aen.12111>
- 872 O’Grady, P. M., & DeSalle, R. (2018). Phylogeny of the genus *Drosophila*. *Genetics*,  
873 209(1), 1–25. <https://doi.org/10.1534/genetics.117.300583>
- 874 Pentinsaari, M., Ratnasingham, S., Miller, S. E., & Hebert, P. D. N. (2020). BOLD and  
875 GenBank revisited – Do identification errors arise in the lab or in the sequence  
876 libraries? *PLoS One*, 15(4): e0231814. <https://doi.org/10.1371/journal.pone.0231814>
- 877
- 878 Pfeiffer, D. G., Shrader, M. E., Wahls, J. C. E., Willbrand, B. N., Sandum, I., van der Linde,  
879 K., Laub, C. A., ... Day, E. R. (2019). African Fig Fly (Diptera: Drosophilidae): Biology,  
880 expansion of geographic range, and its potential status as a soft fruit pest. *Journal*  
881 *of Integrated Pest Management*, 10(1), 1–8. <https://doi.org/10.1093/jipm/pmz018>
- 882 Prendini, L., Hanner, R., & DeSalle, R. (2002). Obtaining, storing and archiving specimens  
883 and tissue samples for use in molecular studies. *In Techniques in Molecular*  
884 *Systematics and Evolution*. [https://doi.org/10.1007/978-3-0348-8125-8\\_11](https://doi.org/10.1007/978-3-0348-8125-8_11)
- 885 Prévost, G. (2009). Parasitoids of *Drosophila*. *In Advances in parasitology*.  
886 [https://doi.org/10.1016/S0065-308X\(09\)70018-1](https://doi.org/10.1016/S0065-308X(09)70018-1)
- 887 Quicke, D. L. J. (2015). The Braconid and Ichneumonid parasitoid wasps: Biology,  
888 systematics, evolution and ecology. Wiley-Blackwell,  
889 <https://doi.org/10.1002/9781118907085>
- 890 Ratnasingham, S., & Hebert, P. D. N. (2007). BARCODING: bold: The Barcode of Life Data  
891 System (<http://www.barcodinglife.org>). *Molecular Ecology Notes*, 7(3), 355-364,  
892 <https://doi.org/10.1111/j.1471-8286.2007.01678.x>
- 893 Ratnasingham, S., & Hebert, P. D. N. (2013). A DNA-based registry for all animal species:  
894 the barcode index number (BIN) system. *PLoS ONE*, 8(7): e66213.  
895 <https://doi.org/10.1371/journal.pone.0066213>
- 896 Raupach, M. J., Hendrich, L., Kuchler, S. M., Deister, F., Moriniere, J., & Gossner, M. M.  
897 (2014). Building-Up of a DNA Barcode Library for true bugs (Insecta: Hemiptera:  
898 Heteroptera) of Germany reveals taxonomic uncertainties and surprises. *PLoS ONE*,  
899 9(9), 1–13. <https://doi.org/10.1371/journal.pone.0106940>
- 900 Remsen, J., & O’Grady, P. (2002). Phylogeny of Drosophilinae (Diptera: Drosophilidae),  
901 with comments on combined analysis and character support. *Molecular*  
902 *Phylogenetics and Evolution*, 24(2), 249-264, [https://doi.org/10.1016/S1055-](https://doi.org/10.1016/S1055-7903(02)00226-9)  
903 [7903\(02\)00226-9](https://doi.org/10.1016/S1055-7903(02)00226-9)
- 904 Reumer, B. M., van Alphen, J. J. M., & Kraaijeveld, K. (2012). Occasional males in  
905 parthenogenetic populations of *Asobara japonica* (Hymenoptera: Braconidae): Low  
906 *Wolbachia* titer or incomplete coadaptation. *Heredity*, 108(3), 341-346,  
907 <https://doi.org/10.1038/hdy.2011.82>
- 908 Rosen, D. (1986). The role of taxonomy in effective biological control programs.  
909 *Agriculture, Ecosystems & Environment*, 15(2-3), 121-129.  
910 [https://doi.org/10.1016/0167-8809\(86\)90085-X](https://doi.org/10.1016/0167-8809(86)90085-X)



- 911 Santos, W. G. N., Fernandes, E. C., Souza, M. M., Guimarães, J. A., & Araujo, E. L. (2016).  
912 First record of Eucoilinae (Hymenoptera: Figitidae), parasitoids of African fig fly  
913 *Zaprionus indianus* Gupta (Diptera: Drosophilidae), in the Caatinga biome.  
914 *Semina: Ciências Agrárias*, 37(5), 3055–3058. [https://doi.org/10.5433/1679-](https://doi.org/10.5433/1679-0359.2016v37n5p3055)  
915 [0359.2016v37n5p3055](https://doi.org/10.5433/1679-0359.2016v37n5p3055)
- 916 Schilthuizen, M., Vairappan, C. S., Slade, E. M., Mann, D. J., & Miller, J. A. (2015).  
917 Specimens as primary data: Museums and “open science.” *Trends in Ecology and*  
918 *Evolution*, 30(5), 237–238. <https://doi.org/10.1016/j.tree.2015.03.002>
- 919 Schlenke, T. A., Morales, J., Govind, S., & Clark, A. G. (2007). Contrasting infection  
920 strategies in generalist and specialist wasp parasitoids of *Drosophila melanogaster*.  
921 *PLoS Pathogens*, 3(10):e158, <https://doi.org/10.1371/journal.ppat.0030158>
- 922 Schindel, D., & Miller, S. E. (2010). Provisional Nomenclature the on-ramp to taxonomic  
923 names. In: Polaszek, A. (Ed), *Systema Nature*, 250: The Linnaean Ark. CRC, Boca  
924 Raton, 109-115.
- 925 Seehausen, M. L., Ris, N., Driss, L., Racca, A., Girod, P., Warot, S., Borowiec, N., Tosevski,  
926 I., & Kenis, M. (2020). Evidence for a cryptic parasitoid species reveals its suitability  
927 as a biological control agent. *Scientific reports*, 10: 19096.  
928 <https://doi.org/10.1038/s41598-020-76180-5>
- 929 Shokralla, S., Spall, J. L., Gibson, J. F., & Hajibabaei, M. (2012). Next-generation  
930 sequencing technologies for environmental DNA research. *In Molecular Ecology*,  
931 21(8), 1794-1805, <https://doi.org/10.1111/j.1365-294X.2012.05538.x>
- 932 Smith, M. A., Fisher, B. L., & Hebert, P. D. N. (2005). DNA barcoding for effective  
933 biodiversity assessment of a hyperdiverse arthropod group: The ants of  
934 Madagascar. *Philosophical Transactions of the Royal Society Biological Sciences*,  
935 360(1462), 1825-1834, <https://doi.org/10.1098/rstb.2005.1714>
- 936 Smith, M. A., Fernandez-Triana, J. L., Eveleigh, E., Gomez, J., Guclu, C., Hallwachs, W.,  
937 Hebert, P. D. N., ... Zaldivar-Riveron, A. (2013). DNA barcoding and the taxonomy of  
938 Microgastrinae wasps (Hymenoptera, Braconidae): impacts after 8 years and nearly  
939 20000 sequences. *Molecular Ecology Resources*, 13, 168-276,  
940 <https://doi.org/10.1111/1755-0988.12038>
- 941 Staniczenko, P. P. A., Reed-Tsochas, F., Lewis, O. T., Tylianakis, J. M., Albrecht, M.,  
942 Coudrain, V., & Klein, A. M. (2017). Predicting the effect of habitat modification on  
943 networks of interacting species. *Nature Communications*, 8, 792,  
944 <https://doi.org/10.1038/s41467-017-00913-w>
- 945 Tarli, V. D., Grandcolas, P., & Pellens, R. (2018). The informative value of museum  
946 collections for ecology and conservation: A comparison with target sampling in the  
947 Brazilian Atlantic forest. *PLoS ONE*, 13(11): e0205710.  
948 <https://doi.org/10.1371/journal.pone.0205710>
- 949 Terry, J. C. D., Chen, J., & Lewis, O. T. (2021). The effect of natural enemies on the  
950 coexistence of competing species - an empirical test using Bayesian modern  
951 coexistence theory. *bioRxiv*: <https://doi.org/10.1101/2020.08.27.270389>
- 952 Thierry, M., Pardikes, N. A., Lue, C.-H., Lewis, O. L., & Hrcek, J. (2021). Experimental  
953 warming influences species abundances in a *Drosophila* host community through  
954 direct effects on species performance rather than altered competition and

- 955 parasitism. *PLoS ONE*, 16(2): e0245029.  
956 <https://doi.org/10.1371/journal.pone.0245029>
- 957 Troudet, J., Vignes-Lebbe, R., Grandcolas, P., & Legendre, F. (2018). The increasing  
958 disconnection of primary biodiversity data from specimens: How does it happen  
959 and how to handle it? *Systematic Biology*, 67(6), 1110–1119.  
960 <https://doi.org/10.1093/sysbio/syy044>
- 961 Tylianakis, J. M., Tscharrntke, T., & Lewis, O. T. (2007). Habitat modification alters the  
962 structure of tropical host-parasitoid food webs. *Nature*, 445(7124), 202–205.  
963 <https://doi.org/10.1038/nature05429>
- 964 Wachi, N., Nomano, F. Y., Mitsui, H., Kasuya, N., & Kimura, M. T. (2015). Taxonomy and  
965 evolution of putative thelytokous species of Leptopilina (Hymenoptera: Figitidae)  
966 from Japan, with description of two new species. *Entomological Science*, 18(1), 41–  
967 54. <https://doi.org/10.1111/ens.12089>
- 968 Wang, X.-G., Biondi, A., & Daane, K. M. (2020). Functional responses of three candidate  
969 Asian larval parasitoids evaluated for classical biological control of *Drosophila*  
970 *suzukii*. *Journal of Economic Entomology*, 113(1): 73–80. doi: 10.1093/jee/toz265
- 971 Wang, X.-G., Biondi, A., Nance, A. N., Zappalà, L., Hoelmer, K. A., & Daane, K. M. (2021).  
972 Assessment of *Asobara japonica* as a potential biological control agent for the  
973 spotted wing drosophila, *Drosophila suzukii*. *Entomologia Generalis (In Press)* doi:  
974 10.1127/entomologia/2020/1100
- 975 Wang, X.-G., Lee, J., Daane, K.M., Buffington, M., & Hoelmer, K. A. (2020). Biological  
976 control of *Drosophila suzukii*. *CAB Reviews* 54, 10.1079/PAVSNNR202015054
- 977 Weigand, H., Beermann, A. j., Čiampor, F., Costa, F. O., Csabai, Z., Duarte, S., Geiger, M.  
978 F., ... Ekrem, T. (2019). DNA barcode reference libraries for the monitoring of  
979 aquatic biota in Europe: Gap-analysis and recommendations for future work.  
980 *Science of The Total Environment*. 687(15), 499-254.  
981 <https://doi.org/10.1016/j.scitotenv.2019.04.247>
- 982 Xiao, J. H., Wang, N. X., Murphy, R. W., Cook, J., Jia, L. Y., & Huang, D. W. (2012).  
983 *Wolbachia* infection and dramatic intraspecific mitochondrial DNA divergence in a  
984 fig wasp. *Evolution*, 66, 1907-1916, [https://doi.org/10.1111/j.1558-](https://doi.org/10.1111/j.1558-5646.2011.01561.x)  
985 5646.2011.01561.x
- 986 Xie, J., Tiner, B., Vilchez, I., & Mateos, M. (2011). Effect of the *Drosophila* endosymbiont  
987 *Spiroplasma* on parasitoid wasp development and on the reproductive fitness of  
988 wasp-attacked fly survivors. *Evolutionary Ecology*, 25, 1065-1079,  
989 <https://doi.org/10.1007/s10682-010-9453-7>
- 990 Xie, J., Winter, C., Winter, L., & Mateos, M. (2015). Rapid spread of the defensive  
991 endosymbiont *Spiroplasma* in *Drosophila hydei* under high parasitoid wasp  
992 pressure. *FEMS Microbiology Ecology*, 91(2), 1-11,  
993 <https://doi.org/10.1093/femsec/iu017>
- 994 Yassin, A. (2013). Phylogenetic classification of the Drosophilidae Rondani (Diptera): The  
995 role of morphology in the postgenomic era. *Systematic Entomology*,  
996 <https://doi.org/10.1111/j.1365-3113.2012.00665.x>
- 997 Yassin, A., & David, J. R. (2010). Revision of the Afrotropical species of *Zaprionus*  
998 (Diptera, Drosophilidae), with descriptions of two new species and notes on

999 internal reproductive structures and immature stages. *ZooKeys*, 51, 33-72,  
1000 <https://doi.org/10.3897/zookeys.51.380>  
1001 Ye, Z., Vollhardt, I. M. G., Girtler, S., Wallinger, C., Tomanovic, Z., & Traugott, M. (2017).  
1002 An effective molecular approach for assessing cereal aphid-parasitoid-  
1003 endosymbiont networks. *Scientific Reports*, 7(1), 1–12.  
1004 <https://doi.org/10.1038/s41598-017-02226-w>  
1005 Yu, D. S. K., 2016, Global index for Ichneumonoidea. Last updated October 22, 2016  
1006 [https://web.archive.org/web/20161022093945/http://ichneumonoidea.name/gl](https://web.archive.org/web/20161022093945/http://ichneumonoidea.name/global.php)  
1007 [bal.php](http://ichneumonoidea.name/global.php)  
1008

### 1009 **Data Accessibility**

1010 The DROP database is freely accessible at Zenodo depository  
1011 (<http://doi.org/10.5281/zenodo.4519656>). Sequences from GenBank and BOLD, all  
1012 compiled in BOLD, DROP project, DS-DROPAR dataset [dx.doi.org/10.5883/DS-DROPAR](https://dx.doi.org/10.5883/DS-DROPAR).  
1013 New sequences have been deposited in BOLD, DROP project (datasets: DS-LABS  
1014 [dx.doi.org/10.5883/DS-LABS](https://dx.doi.org/10.5883/DS-LABS) and DS-AUSPTOID [dx.doi.org/10.5883/DS-AUSPTOID](https://dx.doi.org/10.5883/DS-AUSPTOID)).

1015

### 1016 **Author Contributions**

1017 The initial project idea was originated by C-HL, MLB, JH, MM, TS, JV, SG, and  
1018 PPAS. Molecular work was conducted by C-HL, SS, ML, AJ, and AD. BOLD and GenBank  
1019 data was harvested by TAE and C-HL. Figures were made by AL and C-HL. Laboratory and  
1020 field sample preparations were conducted by MTK, YC, TS, MM, SG, JV, EG, MG, XW,  
1021 KM, KMD, PA, NAP, MT, JJB, MP, FMJ, WDT, JSD, BW, OTL, PPAS, JL and AL. Taxonomic  
1022 concepts and interpretations were conducted by RRK, MLB, CH-L, PG, and SEM. DROP  
1023 database was built by JH and C-HL. All authors contributed to review and final revisions  
1024 of the manuscript, which was written primarily by C-HL, MLB and JH.

1025

1026

Figures:

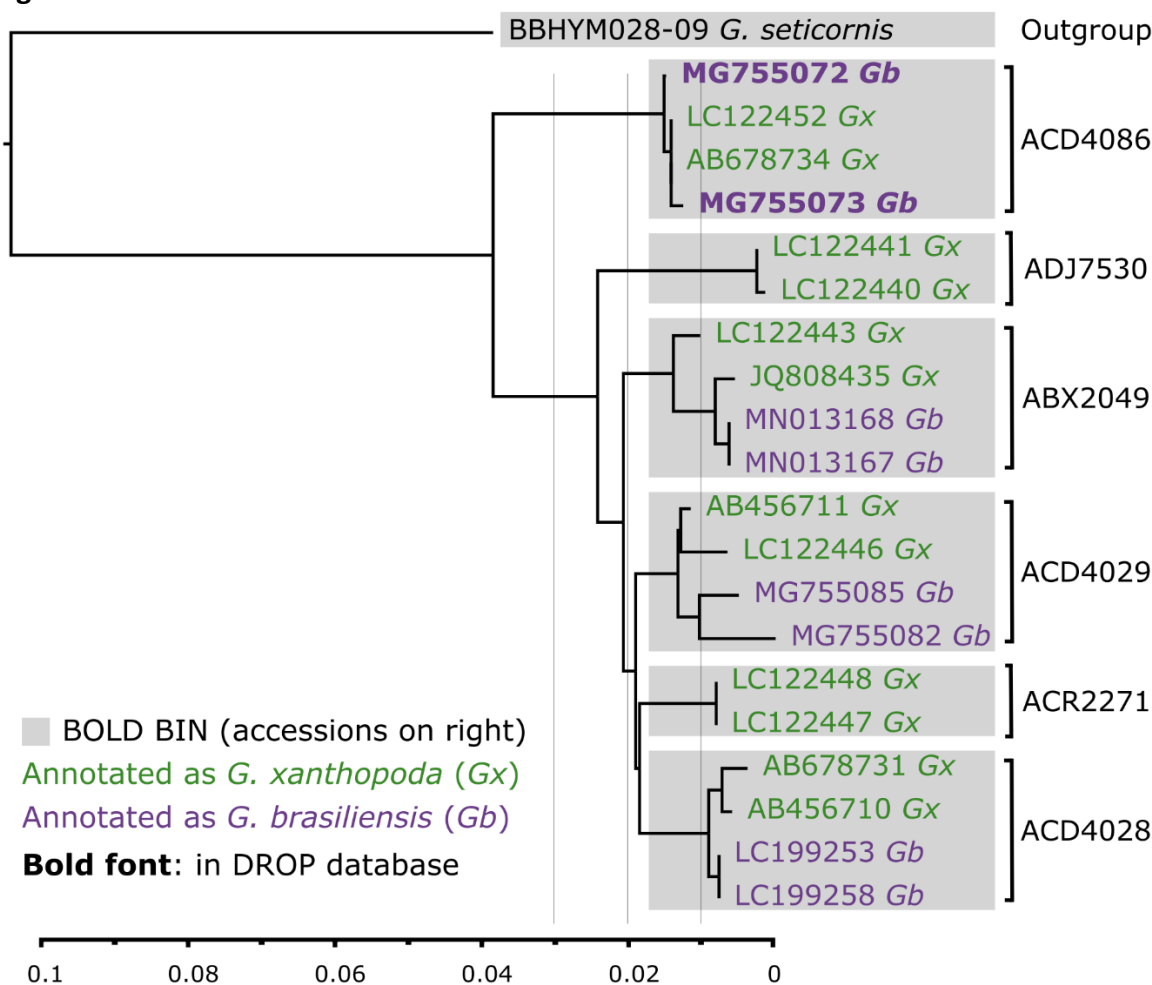

1027

1028 Figure 1: An example of difficulties of molecular identification demonstrated on  
 1029 *Ganaspis xanthopoda* and *G. brasiliensis*. Only two sequences (in bold text) can be  
 1030 reliably used for identification and are included in DROP database. To select the  
 1031 sequences, we searched the BINs associated with the organism's name "*Ganaspis*  
 1032 *xanthopoda*" (green) or "*Ganaspis brasiliensis*" (purple) in BOLD. From each BIN, two  
 1033 sequences from each species were selected to build a neighbor-joining tree (bottom axis  
 1034 indicated % genetic divergence). There was a total of 6 BINs (gray boxes) in this  
 1035 sequence complex. Of these, 4 BINs contained both species names and without  
 1036 examination of vouchers, identification would be impossible. In DROP, vouchers from  
 1037 two sequences, **MG755073** and **MG755072**, were deposited in CNR-IPSP (Table S2),  
 1038 examined by taxonomists and identified as *G. brasiliensis*. These two COI sequences can  
 1039 now be used to reliably identify *G. brasiliensis*. For *G. xanthopoda*, there were no  
 1040 available vouchers or reliable sequences that passed DROP standards to use for  
 1041 identification. Species delimitation between *G. brasiliensis* and *G. xanthopoda* is  
 1042 convoluted, varies according to arbitrary % genetic divergence (gray vertical lines), and  
 1043 needs an integrative taxonomic revision.



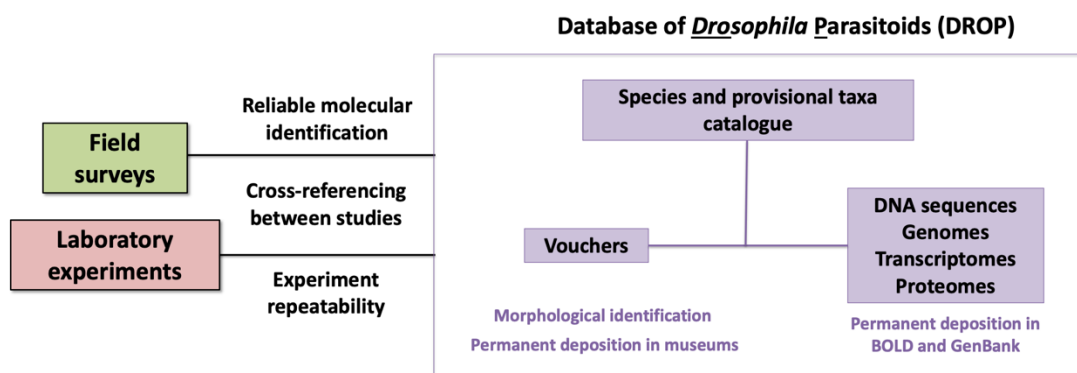

1044

1045 **Figure 2:** Concept of a centralized, vetted, curated database for *Drosophila* Parasitoids  
 1046 (DROP) we developed. First, we provide a species and provisional species catalog with  
 1047 correct taxonomy. Second, to provide a reliable genetic reference library, we link  
 1048 genetic data (DNA sequences, genomes, transcriptomes, proteomes) to a voucher  
 1049 connected to the species catalog. Third, we link the two primary sources of data (field  
 1050 surveys and laboratory experiments) by requiring a permanent deposition of vouchers  
 1051 and sequences in order to be included in DROP.

1052

1053

1054

**Tables:**

1055 **Table 1:** List of species and provisional species included in DROP. For additional  
 1056 taxonomic details, see DROP.

1057

| Superfamily  | Family       | Genus                  | Species_Name           | Author           |
|--------------|--------------|------------------------|------------------------|------------------|
| Chalcidoidea | Encyrtidae   |                        | <i>drop_Cha2_sp12</i>  |                  |
| Chalcidoidea | Encyrtidae   | <i>Tachinaephagus</i>  | <i>drop_IR1_sp41</i>   | Kimura           |
| Chalcidoidea | Encyrtidae   | <i>Tachinaephagus</i>  | <i>drop_BG1_sp42</i>   | Kimura           |
| Chalcidoidea | Encyrtidae   | <i>Tachinaephagus</i>  | <i>zealandicus</i>     | Ashmead 1904     |
| Chalcidoidea | Pteromalidae |                        | <i>drop_Pte69_sp11</i> |                  |
| Chalcidoidea | Pteromalidae | <i>Pachycrepoideus</i> | <i>vindemmiae</i>      | (Rondani, 1875)  |
| Chalcidoidea | Pteromalidae | <i>Spalangia</i>       | <i>drop_IR1_sp38</i>   | Kimura           |
| Chalcidoidea | Pteromalidae | <i>Spalangia</i>       | <i>drop_NG1_sp39</i>   | Kimura           |
| Chalcidoidea | Pteromalidae | <i>Spalangia</i>       | <i>drop_SK1_sp40</i>   | Kimura           |
| Chalcidoidea | Pteromalidae | <i>Spalangia</i>       | <i>drosophilae</i>     | Ashmead 1887     |
| Chalcidoidea | Pteromalidae | <i>Spalangia</i>       | <i>erythromera</i>     | Foerster 1850    |
| Chalcidoidea | Pteromalidae | <i>Trichomalopsis</i>  | <i>dubia</i>           | (Ashmead, 1896)  |
| Chalcidoidea | Pteromalidae | <i>Trichomalopsis</i>  | <i>microptera</i>      | (Lindeman, 1887) |
| Chalcidoidea | Pteromalidae | <i>Trichomalopsis</i>  | <i>nigricola</i>       | Boucek           |

|              |              |                       |                            |                            |
|--------------|--------------|-----------------------|----------------------------|----------------------------|
| Chalcidoidea | Pteromalidae | <i>Trichomalopsis</i> | <i>sarcophagae</i>         | (Gahan, 1914)              |
| Chalcidoidea | Pteromalidae | <i>Vrestovia</i>      | <i>brevior</i>             | Boucek 1993                |
| Chalcidoidea | Pteromalidae | <i>Vrestovia</i>      | <i>fidenas</i>             | (Walker, 1848)             |
| Chalcidoidea | Pteromalidae |                       | <i>drop_PacAtl_sp46</i>    |                            |
| Chalcidoidea | Pteromalidae |                       | <i>drop_PachyPort_sp45</i> |                            |
| Chalcidoidea |              |                       | <i>drop_CH_sp64</i>        |                            |
| Cynipoidea   | Figitidae    | <i>Ganaspis</i>       | <i>brasiliensis</i>        | (Ihering, 1905)            |
| Cynipoidea   | Figitidae    | <i>Ganaspis</i>       | <i>drop_Gan_sp51</i>       |                            |
| Cynipoidea   | Figitidae    | <i>Ganaspis</i>       | <i>drop_Gan_sp52</i>       |                            |
| Cynipoidea   | Figitidae    | <i>Ganaspis</i>       | <i>drop_Gan_sp53</i>       |                            |
| Cynipoidea   | Figitidae    | <i>Ganaspis</i>       | <i>drop_Gsp1_sp67</i>      |                            |
| Cynipoidea   | Figitidae    | <i>Ganaspis</i>       | <i>drop_Gsp2_sp68</i>      |                            |
| Cynipoidea   | Figitidae    | <i>Ganaspis</i>       | <i>drop_Gsp50_sp66</i>     |                            |
| Cynipoidea   | Figitidae    | <i>Ganaspis</i>       | <i>drop_IR1_sp25</i>       | Kimura                     |
| Cynipoidea   | Figitidae    | <i>Ganaspis</i>       | <i>drop_IR2_sp26</i>       | Kimura                     |
| Cynipoidea   | Figitidae    | <i>Ganaspis</i>       | <i>drop_Gan1_sp1</i>       |                            |
| Cynipoidea   | Figitidae    | <i>Ganaspis</i>       | <i>drop_TK1_sp27</i>       | Kimura                     |
| Cynipoidea   | Figitidae    | <i>Ganaspis</i>       | <i>hookeri</i>             | Crawford 1913              |
| Cynipoidea   | Figitidae    | <i>Ganaspis</i>       | <i>mahensis</i>            | Kieffer 1911               |
| Cynipoidea   | Figitidae    | <i>Ganaspis</i>       | <i>mellipes</i>            | (Say, 1826)                |
| Cynipoidea   | Figitidae    | <i>Ganaspis</i>       | <i>mundata</i>             | Forster 1869               |
| Cynipoidea   | Figitidae    | <i>Ganaspis</i>       | <i>seticornis</i>          | (Hellen, 1960)             |
| Cynipoidea   | Figitidae    | <i>Ganaspis</i>       | <i>tenuicornis</i>         | Kieffer 1904               |
| Cynipoidea   | Figitidae    | <i>Ganaspis</i>       | <i>xanthopoda</i>          | (Ashmead, 1896)            |
| Cynipoidea   | Figitidae    | <i>Kleidotoma</i>     | <i>bicolor</i>             | (Giraud, 1860)             |
| Cynipoidea   | Figitidae    | <i>Kleidotoma</i>     | <i>dolichocera</i>         | Thomson 1877               |
| Cynipoidea   | Figitidae    | <i>Kleidotoma</i>     | <i>drop_TK1_sp28</i>       | Kimura                     |
| Cynipoidea   | Figitidae    | <i>Kleidotoma</i>     | <i>filicornis</i>          | (Cameron, 1889)            |
| Cynipoidea   | Figitidae    | <i>Kleidotoma</i>     | <i>icarus</i>              | (Quinlan, 1964)            |
| Cynipoidea   | Figitidae    | <i>Kleidotoma</i>     | <i>psiloides</i>           | Westwood 1833              |
| Cynipoidea   | Figitidae    | <i>Kleidotoma</i>     | <i>tetratoma</i>           | (Hartig, 1841)             |
| Cynipoidea   | Figitidae    | <i>Leptolamina</i>    | <i>drop_Fig64_sp5</i>      |                            |
| Cynipoidea   | Figitidae    | <i>Leptolamina</i>    | <i>drop_Lmn_sp6</i>        |                            |
| Cynipoidea   | Figitidae    | <i>Leptolamina</i>    | <i>drop_TK1_sp29</i>       | Kimura                     |
| Cynipoidea   | Figitidae    | <i>Leptolamina</i>    | <i>gressitti</i>           | Yoshimoto & Yasumatsu 1965 |
| Cynipoidea   | Figitidae    | <i>Leptolamina</i>    | <i>papuensis</i>           | Yoshimoto 1963             |
| Cynipoidea   | Figitidae    | <i>Leptolamina</i>    | <i>ponapensis</i>          | Yoshimoto 1962             |
| Cynipoidea   | Figitidae    | <i>Leptolamina</i>    | <i>seychellensis</i>       | (Kieffer, 1911)            |

|            |           |                    |                          |                                            |
|------------|-----------|--------------------|--------------------------|--------------------------------------------|
| Cynipoidea | Figitidae | <i>Leptopilina</i> | <i>atraticeps</i>        | (Kieffer, 1911)                            |
| Cynipoidea | Figitidae | <i>Leptopilina</i> | <i>australis</i>         | (Belizin, 1966)                            |
| Cynipoidea | Figitidae | <i>Leptopilina</i> | <i>boulardi</i>          | (Barbotin, Carton & Kelner-Pillault, 1979) |
| Cynipoidea | Figitidae | <i>Leptopilina</i> | <i>clavipes</i>          | (Hartig, 1841)                             |
| Cynipoidea | Figitidae | <i>Leptopilina</i> | <i>cupulifera</i>        | (Kieffer, 1916)                            |
| Cynipoidea | Figitidae | <i>Leptopilina</i> | <i>decemflagella</i>     | Lue & Buffington 2017                      |
| Cynipoidea | Figitidae | <i>Leptopilina</i> | <i>drop_Lep_sp54</i>     |                                            |
| Cynipoidea | Figitidae | <i>Leptopilina</i> | <i>drop_Lep_sp55</i>     |                                            |
| Cynipoidea | Figitidae | <i>Leptopilina</i> | <i>drop_Lep_sp56</i>     |                                            |
| Cynipoidea | Figitidae | <i>Leptopilina</i> | <i>drop_Lep_sp57</i>     |                                            |
| Cynipoidea | Figitidae | <i>Leptopilina</i> | <i>drop_Lep_sp58</i>     |                                            |
| Cynipoidea | Figitidae | <i>Leptopilina</i> | <i>drop_Lep_sp59</i>     |                                            |
| Cynipoidea | Figitidae | <i>Leptopilina</i> | <i>drop_Lep_sp60</i>     |                                            |
| Cynipoidea | Figitidae | <i>Leptopilina</i> | <i>drop_Lep_sp61</i>     |                                            |
| Cynipoidea | Figitidae | <i>Leptopilina</i> | <i>drop_Lep_sp62</i>     |                                            |
| Cynipoidea | Figitidae | <i>Leptopilina</i> | <i>drop_BG1_sp34</i>     | Kimura                                     |
| Cynipoidea | Figitidae | <i>Leptopilina</i> | <i>drop_Fig059_sp4</i>   |                                            |
| Cynipoidea | Figitidae | <i>Leptopilina</i> | <i>drop_Fig124_sp2</i>   |                                            |
| Cynipoidea | Figitidae | <i>Leptopilina</i> | <i>drop_Fig58_sp3</i>    |                                            |
| Cynipoidea | Figitidae | <i>Leptopilina</i> | <i>drop_IR1_sp30</i>     | Kimura                                     |
| Cynipoidea | Figitidae | <i>Leptopilina</i> | <i>drop_NG1_sp33</i>     | Kimura                                     |
| Cynipoidea | Figitidae | <i>Leptopilina</i> | <i>drop_SK1_sp35</i>     | Kimura                                     |
| Cynipoidea | Figitidae | <i>Leptopilina</i> | <i>drop_STL_sp7</i>      |                                            |
| Cynipoidea | Figitidae | <i>Leptopilina</i> | <i>drop_TK2_sp31</i>     | Kimura                                     |
| Cynipoidea | Figitidae | <i>Leptopilina</i> | <i>drop_TK3_sp32</i>     | Kimura                                     |
| Cynipoidea | Figitidae | <i>Leptopilina</i> | <i>fimbriata</i>         | (Kieffer, 1901)                            |
| Cynipoidea | Figitidae | <i>Leptopilina</i> | <i>freyae</i>            | Allemand & Nordlander 2002                 |
| Cynipoidea | Figitidae | <i>Leptopilina</i> | <i>guineaensis</i>       | Allemand & Nordlander 2002                 |
| Cynipoidea | Figitidae | <i>Leptopilina</i> | <i>heterotoma</i>        | (Thomson, 1862)                            |
| Cynipoidea | Figitidae | <i>Leptopilina</i> | <i>japonica japonica</i> | Novkovic & Kimura 2011                     |
| Cynipoidea | Figitidae | <i>Leptopilina</i> | <i>lasallei</i>          | Buffington & Guerrieri 2020                |
| Cynipoidea | Figitidae | <i>Leptopilina</i> | <i>leipsi</i>            | Lue & Buffington 2018                      |
| Cynipoidea | Figitidae | <i>Leptopilina</i> | <i>lonchaeae</i>         | (Cameron, 1912)                            |
| Cynipoidea | Figitidae | <i>Leptopilina</i> | <i>longipes</i>          | (Hartig, 1841)                             |
| Cynipoidea | Figitidae | <i>Leptopilina</i> | <i>mahensis</i>          | (Kieffer, 1911)                            |

|                |            |                     |                        |                                    |
|----------------|------------|---------------------|------------------------|------------------------------------|
| Cynipoidea     | Figitidae  | <i>Leptopilina</i>  | <i>maia</i>            | Lue & Buffington<br>2016           |
| Cynipoidea     | Figitidae  | <i>Leptopilina</i>  | <i>maria</i>           | (Girault, 1930)                    |
| Cynipoidea     | Figitidae  | <i>Leptopilina</i>  | <i>orientalis</i>      | Allemand &<br>Nordlander 2002      |
| Cynipoidea     | Figitidae  | <i>Leptopilina</i>  | <i>pacifica</i>        | Novkovic & Kimura<br>2011          |
| Cynipoidea     | Figitidae  | <i>Leptopilina</i>  | <i>rufipes</i>         | (Cameron, 1908)                    |
| Cynipoidea     | Figitidae  | <i>Leptopilina</i>  | <i>rugipunctata</i>    | (Yoshimoto, 1962)                  |
| Cynipoidea     | Figitidae  | <i>Leptopilina</i>  | <i>ryukyuensis</i>     | Novkovic & Kimura<br>2011          |
| Cynipoidea     | Figitidae  | <i>Leptopilina</i>  | <i>tokioensis</i>      | Wachi & Kimura<br>2015             |
| Cynipoidea     | Figitidae  | <i>Leptopilina</i>  | <i>tsushimaensis</i>   | Wachi & Kimura<br>2015             |
| Cynipoidea     | Figitidae  | <i>Leptopilina</i>  | <i>victoriae</i>       | Nordlander 1980                    |
| Cynipoidea     | Figitidae  | <i>Rhoptromeris</i> | <i>heptoma</i>         | (Hartig, 1840)                     |
| Cynipoidea     | Figitidae  | <i>Rhoptromeris</i> | <i>nigriventris</i>    | Nordlander 1978                    |
| Cynipoidea     | Figitidae  | <i>Rhoptromeris</i> | <i>rufiventris</i>     | (Giraud, 1860)                     |
| Cynipoidea     | Figitidae  | <i>Rhoptromeris</i> | <i>villosa</i>         | (Hartig, 1840)                     |
| Cynipoidea     | Figitidae  |                     | <i>drop_Lg500_sp43</i> |                                    |
| Ichneumonoidea | Braconidae | <i>Alysia</i>       | <i>drop_SP1_sp24</i>   | Kimura                             |
| Ichneumonoidea | Braconidae | <i>Aphaereta</i>    | <i>aotea</i>           | Hughes & Woolcock<br>1976          |
| Ichneumonoidea | Braconidae | <i>Aphaereta</i>    | <i>drop_SP1_sp15</i>   | Kimura                             |
| Ichneumonoidea | Braconidae | <i>Aphaereta</i>    | <i>drop_TK1_sp13</i>   | Kimura                             |
| Ichneumonoidea | Braconidae | <i>Aphaereta</i>    | <i>drop_TM1_sp14</i>   | Kimura                             |
| Ichneumonoidea | Braconidae | <i>Aphaereta</i>    | <i>minuta</i>          | (Nees, 1811)                       |
| Ichneumonoidea | Braconidae | <i>Aphaereta</i>    | <i>pallipes</i>        | (Say, 1829)                        |
| Ichneumonoidea | Braconidae | <i>Aphaereta</i>    | <i>scaptomyzae</i>     | Fischer 1966                       |
| Ichneumonoidea | Braconidae | <i>Areotetes</i>    | <i>striatiferus</i>    | Li & van Achterberg<br>2013        |
| Ichneumonoidea | Braconidae | <i>Areotetes</i>    | <i>carinuliferus</i>   | Li & van Achterberg<br>2013        |
| Ichneumonoidea | Braconidae | <i>Asobara</i>      | <i>ajbelli</i>         | Berry 2007                         |
| Ichneumonoidea | Braconidae | <i>Asobara</i>      | <i>albiclava</i>       | Berry 2007                         |
| Ichneumonoidea | Braconidae | <i>Asobara</i>      | <i>antipoda</i>        | (Ashmead, 1900)                    |
| Ichneumonoidea | Braconidae | <i>Asobara</i>      | <i>bactrocerae</i>     | (Gahan, 1952)                      |
| Ichneumonoidea | Braconidae | <i>Asobara</i>      | <i>brevicauda</i>      | van Achterberg &<br>Guerrieri 2016 |
| Ichneumonoidea | Braconidae | <i>Asobara</i>      | <i>citri</i>           | (Fischer, 1963)                    |
| Ichneumonoidea | Braconidae | <i>Asobara</i>      | <i>drop_KG1_sp16</i>   | Kimura                             |
| Ichneumonoidea | Braconidae | <i>Asobara</i>      | <i>drop_NG1_sp17</i>   | Kimura                             |
| Ichneumonoidea | Braconidae | <i>Asobara</i>      | <i>drop_SK2_sp20</i>   | Kimura                             |

|                |            |                    |                       |                                 |
|----------------|------------|--------------------|-----------------------|---------------------------------|
| Ichneumonoidea | Braconidae | <i>Asobara</i>     | <i>drop_SP1_sp18</i>  | Kimura                          |
| Ichneumonoidea | Braconidae | <i>Asobara</i>     | <i>drop_Sp2_sp19</i>  | Kimura                          |
| Ichneumonoidea | Braconidae | <i>Asobara</i>     | <i>elongata</i>       | van Achterberg & Guerrieri 2016 |
| Ichneumonoidea | Braconidae | <i>Asobara</i>     | <i>gahani</i>         | (Papp, 1969)                    |
| Ichneumonoidea | Braconidae | <i>Asobara</i>     | <i>japonica</i>       | Belokobylskij 1998              |
| Ichneumonoidea | Braconidae | <i>Asobara</i>     | <i>kenyaensis</i>     | Peris-Felipo 2014               |
| Ichneumonoidea | Braconidae | <i>Asobara</i>     | <i>leverii</i>        | (Nixon, 1939)                   |
| Ichneumonoidea | Braconidae | <i>Asobara</i>     | <i>mesocauda</i>      | van Achterberg & Guerrieri 2016 |
| Ichneumonoidea | Braconidae | <i>Asobara</i>     | <i>orientalis</i>     | Viereck 1913                    |
| Ichneumonoidea | Braconidae | <i>Asobara</i>     | <i>persimilis</i>     | (Prince, 1976)                  |
| Ichneumonoidea | Braconidae | <i>Asobara</i>     | <i>pleuralis</i>      | (Ashmead, 1905)                 |
| Ichneumonoidea | Braconidae | <i>Asobara</i>     | <i>rossica</i>        | Belokobylskij 1998              |
| Ichneumonoidea | Braconidae | <i>Asobara</i>     | <i>rufescens</i>      | (F <sup>r</sup> ster, 1862)     |
| Ichneumonoidea | Braconidae | <i>Asobara</i>     | <i>tabida</i>         | (Nees, 1834)                    |
| Ichneumonoidea | Braconidae | <i>Asobara</i>     | <i>triangulata</i>    | van Achterberg & Guerrieri 2016 |
| Ichneumonoidea | Braconidae | <i>Asobara</i>     | <i>turneri</i>        | Peris-Felipo 2014               |
| Ichneumonoidea | Braconidae | <i>Asobara</i>     | <i>unicolorata</i>    | van Achterberg & Guerrieri 2016 |
| Ichneumonoidea | Braconidae | <i>Aspilota</i>    | <i>albertica</i>      | Berry 2007                      |
| Ichneumonoidea | Braconidae | <i>Aspilota</i>    | <i>andyaustini</i>    | Wharton 2002                    |
| Ichneumonoidea | Braconidae | <i>Aspilota</i>    | <i>angusta</i>        | Berry 2007                      |
| Ichneumonoidea | Braconidae | <i>Aspilota</i>    | <i>concolor</i>       | Nees 1812                       |
| Ichneumonoidea | Braconidae | <i>Aspilota</i>    | <i>parecur</i>        | Berry 2007                      |
| Ichneumonoidea | Braconidae | <i>Aspilota</i>    | <i>villosa</i>        | Berry 2007                      |
| Ichneumonoidea | Braconidae | <i>Dinotrema</i>   | <i>barrattae</i>      | Berry 2007                      |
| Ichneumonoidea | Braconidae | <i>Dinotrema</i>   | <i>longworthi</i>     | Berry 2007                      |
| Ichneumonoidea | Braconidae | <i>Dinotrema</i>   | <i>philipi</i>        | Berry 2007                      |
| Ichneumonoidea | Braconidae |                    | <i>drop_Aso_sp8</i>   |                                 |
| Ichneumonoidea | Braconidae | <i>Opiognathus</i> | <i>pactus</i>         | (Haliday, 1837)                 |
| Ichneumonoidea | Braconidae | <i>Opius</i>       | <i>bellus</i>         | Gahan 1930                      |
| Ichneumonoidea | Braconidae | <i>Opius</i>       | <i>cinerariae</i>     | Fischer                         |
| Ichneumonoidea | Braconidae | <i>Opius</i>       | <i>crenuliferus</i>   | Li & van Achterberg 2013        |
| Ichneumonoidea | Braconidae | <i>Opius</i>       | <i>monilipalpis</i>   | Li & van Achterberg 2013        |
| Ichneumonoidea | Braconidae | <i>Opius</i>       | <i>ocreatus</i>       | (Papp)                          |
| Ichneumonoidea | Braconidae | <i>Opius</i>       | <i>pallipes</i>       | Wesmael 1835                    |
| Ichneumonoidea | Braconidae | <i>Opius</i>       | <i>pteridiophilus</i> | Wharton & Austin 1990           |

|                |            |                    |                        |                          |
|----------------|------------|--------------------|------------------------|--------------------------|
| Ichneumonoidea | Braconidae | <i>Opius</i>       | <i>pterus</i>          | Wharton & Austin 1990    |
| Ichneumonoidea | Braconidae | <i>Opius</i>       | <i>trimaculatus</i>    | Spinola                  |
| Ichneumonoidea | Braconidae | <i>Opius</i>       | <i>youi</i>            | Li & van Achterberg 2013 |
| Ichneumonoidea | Braconidae | <i>Phaenocarpa</i> | <i>conspurator</i>     | (Haliday, 1838)          |
| Ichneumonoidea | Braconidae | <i>Phaenocarpa</i> | <i>drop_IR1_sp22</i>   | Kimura                   |
| Ichneumonoidea | Braconidae | <i>Phaenocarpa</i> | <i>drop_TK1_sp21</i>   | Kimura                   |
| Ichneumonoidea | Braconidae | <i>Phaenocarpa</i> | <i>tacita</i>          | Stelfox 1941             |
| Ichneumonoidea | Braconidae | <i>Phaenocarpa</i> | <i>drosophilae</i>     | (Fischer 1975)           |
| Ichneumonoidea | Braconidae | <i>Tanycarpa</i>   | <i>bicolor</i>         | (Nees, 1814)             |
| Ichneumonoidea | Braconidae | <i>Tanycarpa</i>   | <i>chors</i>           | Belokobylskij 1998       |
| Ichneumonoidea | Braconidae | <i>Tanycarpa</i>   | <i>drop_NG1_sp23</i>   | Kimura                   |
| Ichneumonoidea | Braconidae | <i>Tanycarpa</i>   | <i>punctata</i>        | van Achterberg 1976      |
| Ichneumonoidea | Braconidae |                    | <i>drop_Aly_sp47</i>   |                          |
| Ichneumonoidea | Braconidae |                    | <i>drop_Aly_sp48</i>   |                          |
| Ichneumonoidea | Braconidae |                    | <i>drop_Aly_sp49</i>   |                          |
| Ichneumonoidea | Braconidae |                    | <i>drop_Aly_sp50</i>   |                          |
| Ichneumonoidea | Braconidae |                    | <i>drop_Aly_sp63</i>   |                          |
| Ichneumonoidea | Braconidae |                    | <i>drop_Aso_sp69</i>   |                          |
| Diaprioidea    | Diapriidae | <i>Trichopria</i>  | <i>anastrephae</i>     | Costa Lima 1940          |
| Diaprioidea    | Diapriidae | <i>Trichopria</i>  | <i>drop_BG1_sp37</i>   | Kimura                   |
| Diaprioidea    | Diapriidae | <i>Trichopria</i>  | <i>drop_Dia70_sp65</i> |                          |
| Diaprioidea    | Diapriidae | <i>Trichopria</i>  | <i>drop_Tri_sp44</i>   |                          |
| Diaprioidea    | Diapriidae | <i>Trichopria</i>  | <i>drop_Bdia_sp10</i>  |                          |
| Diaprioidea    | Diapriidae | <i>Trichopria</i>  | <i>drop_Dia127_sp9</i> |                          |
| Diaprioidea    | Diapriidae | <i>Trichopria</i>  | <i>drop_TK1_sp36</i>   | Kimura                   |
| Diaprioidea    | Diapriidae | <i>Trichopria</i>  | <i>drosophilae</i>     | (Kieffer, 1912)          |
| Diaprioidea    | Diapriidae | <i>Trichopria</i>  | <i>modesta</i>         | (Ratzeburg, 1848)        |

1058
